# Supplementary material for: Stage-specific GATA3 induction promotes ILC2 development after lineage commitment
Source: PubMed Central journal article supplement (PMC11226602; doi:10.1038/s41467-024-49881-y), 2024-07-05
Supplement: 41467_2024_49881_MOESM1_ESM.pdf [file 41467_2024_49881_MOESM1_ESM.pdf]

Supplementary Information

**Stage-specific GATA3 induction promotes ILC2 development after lineage commitment**

Hiroki Furuya<sup>1,†</sup>, Yosuke Toda<sup>1,†</sup>, Arifumi Iwata<sup>1,†,\*</sup>, Mizuki Kanai<sup>1</sup>, Kodai Kato<sup>1</sup>, Takashi Kumagai<sup>1</sup>, Takahiro Kageyama<sup>1</sup>, Shigeru Tanaka<sup>1</sup>, Lisa Fujimura<sup>2</sup>, Akemi Sakamoto<sup>2,3</sup>, Masahiko Hatano<sup>2,3</sup>, Akira Suto<sup>1</sup>, Kotaro Suzuki<sup>1</sup>, and Hiroshi Nakajima<sup>1,4,\*</sup>

<sup>1</sup>Department of Allergy and Clinical Immunology, Graduate School of Medicine, Chiba University.

<sup>2</sup>Biomedical Research Center, Chiba University.

<sup>3</sup>Department of Biomedical Science, Graduate School of Medicine, Chiba University.

<sup>4</sup>Chiba University Synergy Institute for Futuristic Mucosal Vaccine Research and Development (cSIMVa), Chiba, Japan

†These authors contributed equally to this work.

\*Corresponding authors: Drs. Arifumi Iwata (aiwata@chiba-u.jp) and Hiroshi Nakajima (nakajimh@faculty.chiba-u.jp)

**This Supplementary Information file contains:**

**Supplementary Figure 1-12**

**Supplementary Table 1, 2**

# Supplementary Figure 1

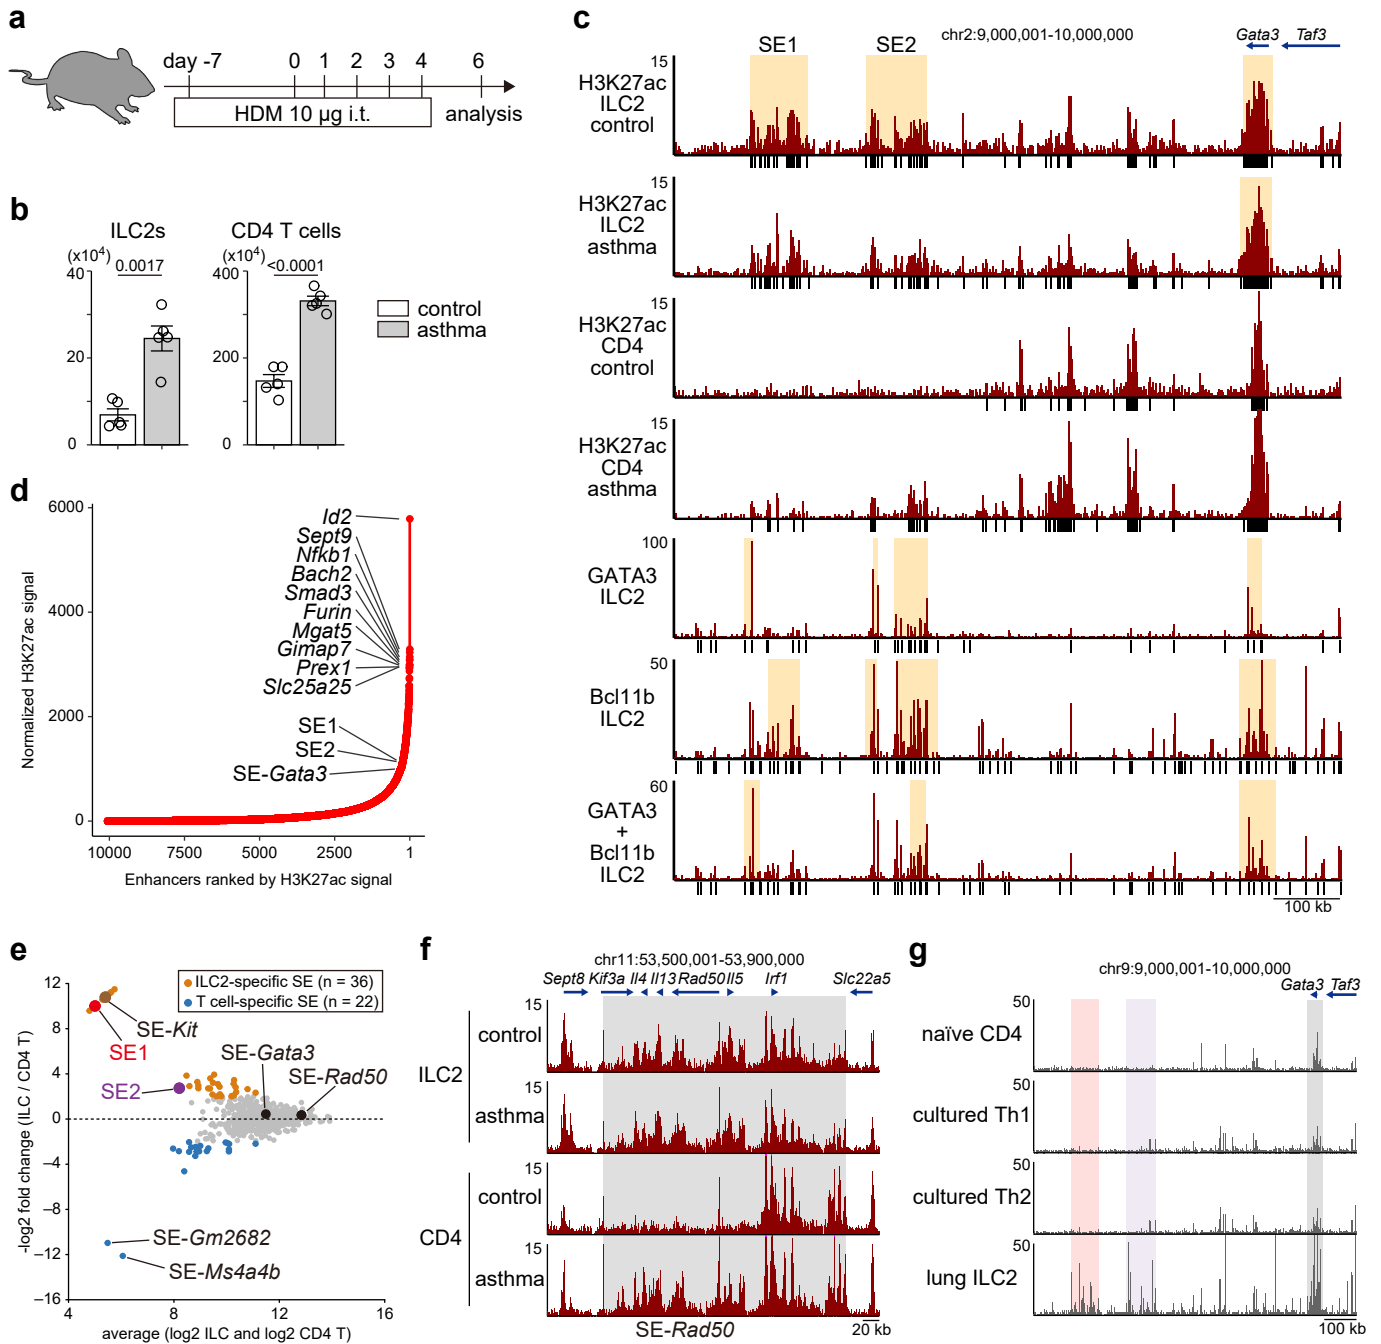

## Supplementary Figure 1. ILC2-specific super-enhancers identified via H3K27ac ChIP-seq.

**a** Experimental procedure of HDM-induced allergic airway inflammation. C57BL/6J mice were intratracheally administered with house dust mites (HDM) on days -7, 0, 1, 2, 3, 4. i.t.: intratracheal. **b-f** Samples were harvested from control mice and asthma mice on day 0 and day 6. ILC2 (CD45<sup>+</sup>Lin1<sup>-</sup>Thy1.2<sup>+</sup>ST2<sup>+</sup> cells) and CD4 T cells (CD45<sup>+</sup>Lin2<sup>-</sup>CD4<sup>+</sup> cells) were isolated. Lin1: CD4, CD5, CD8a, CD11b, CD11c, CD19, CD31, CD49b, FcεR1, TCRβ, TCRγδ, Ter119; Lin2: CD8a, CD11c, CD49b, TCRγδ, EpCAM. **b** The number of ILC2s and CD4 T cells in the lung, n=5. Data are presented as mean±SE. Statistical analysis was performed using unpaired, two-sided Welch's *t*-test. *p* values are shown on the graphs. **c** ILC2s and CD4 T cells were subjected to ChIP-seq analysis of H3K27 acetylation (H3K27ac). UCSC tracks of ChIP-seq of ILC2 and CD4 T cells, and GATA3 (GSE11187), Bcl11b (GSE131082), GATA3+Bcl11b ChIP-seq data. Black bars indicate typical enhancers, and orange boxes indicate super-enhancers. **d** The plot of H3K27ac signal versus rank of stitched enhancers in control ILC2. **e** MA-plot of tag counts on the super-enhancers based on H3K27ac in ILC2 and CD4 T cells under HDM-asthmatic conditions. Total: 624 SEs. A fold change > 4 was considered specific. **f** UCSC tracks of H3K27ac ChIP-seq for ILC2 and CD4 T cells in the *Rad50-Irf1* region. Rectangles indicate super-enhancer regions. **g** UCSC tracks of ATAC-seq for naïve CD4 T cells, cultured Th1 cells, cultured Th2 cells (GSE159505), and lung ILC2 in steady-state conditions. Source data are provided as a Source Data file.

# Supplementary Figure 2

**a**

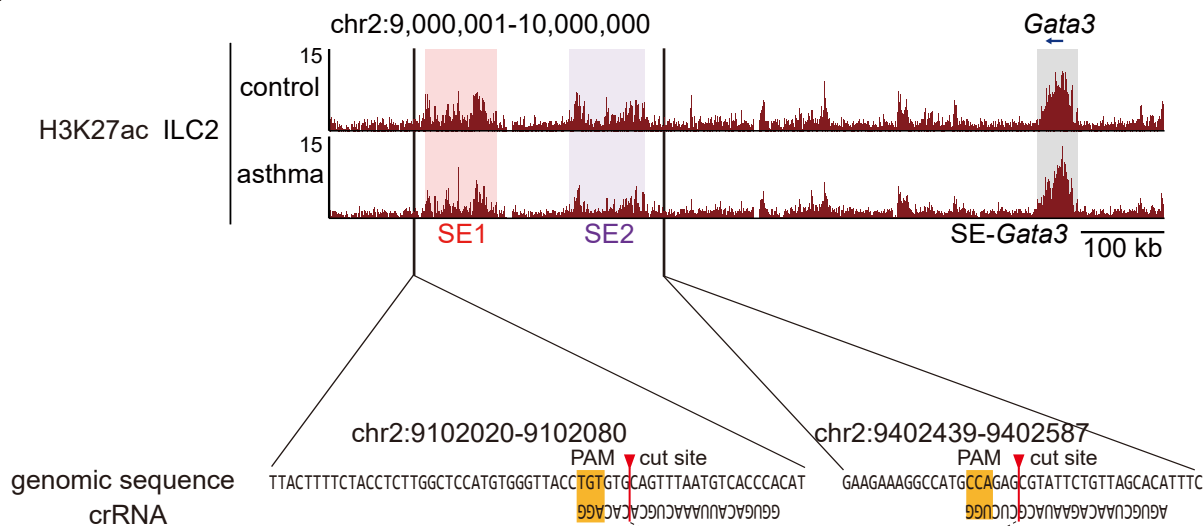

**b**

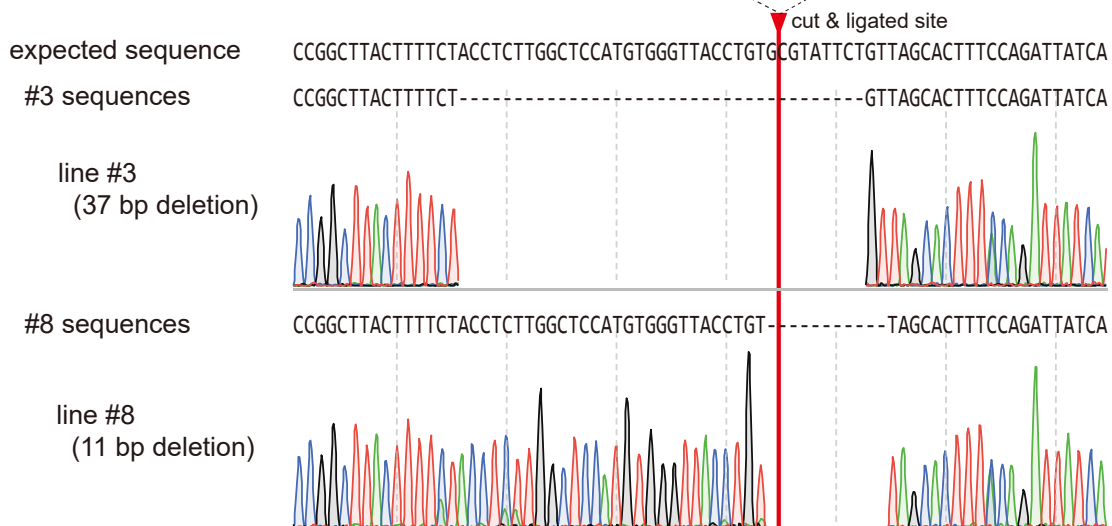

## Supplementary Figure 2. Generation of G3SEKO mice.

**a** Upper panel: UCSC genome tracks around the *Gata3* and G3SE region. Lower panel: Genomic sequence of upstream/downstream crRNA target regions. **b** DNA sequences of G3SE deleted loci from two lines of generated G3SEKO mice.

# Supplementary Figure 3

## a Positive control for T7 assay

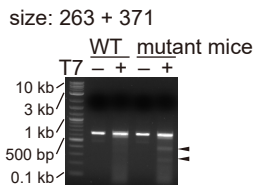

## b Off-targets of upstream crRNA (AGUGCUAACAGAAUACGCUCUGG)

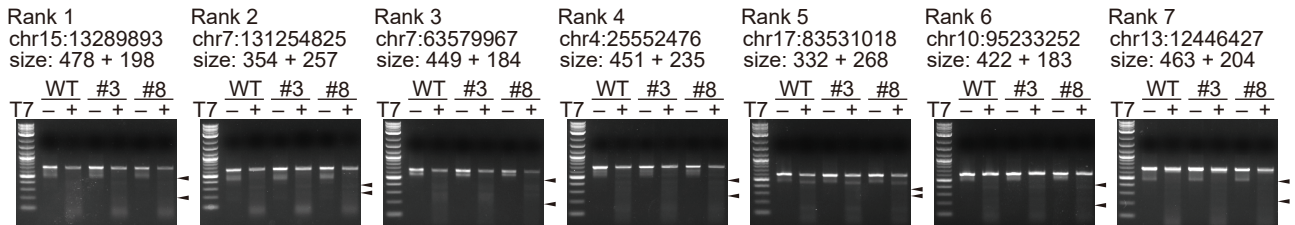

## c Off-targets of upstream crRNA (GGUGACAUUAAACUGCACACAGG)

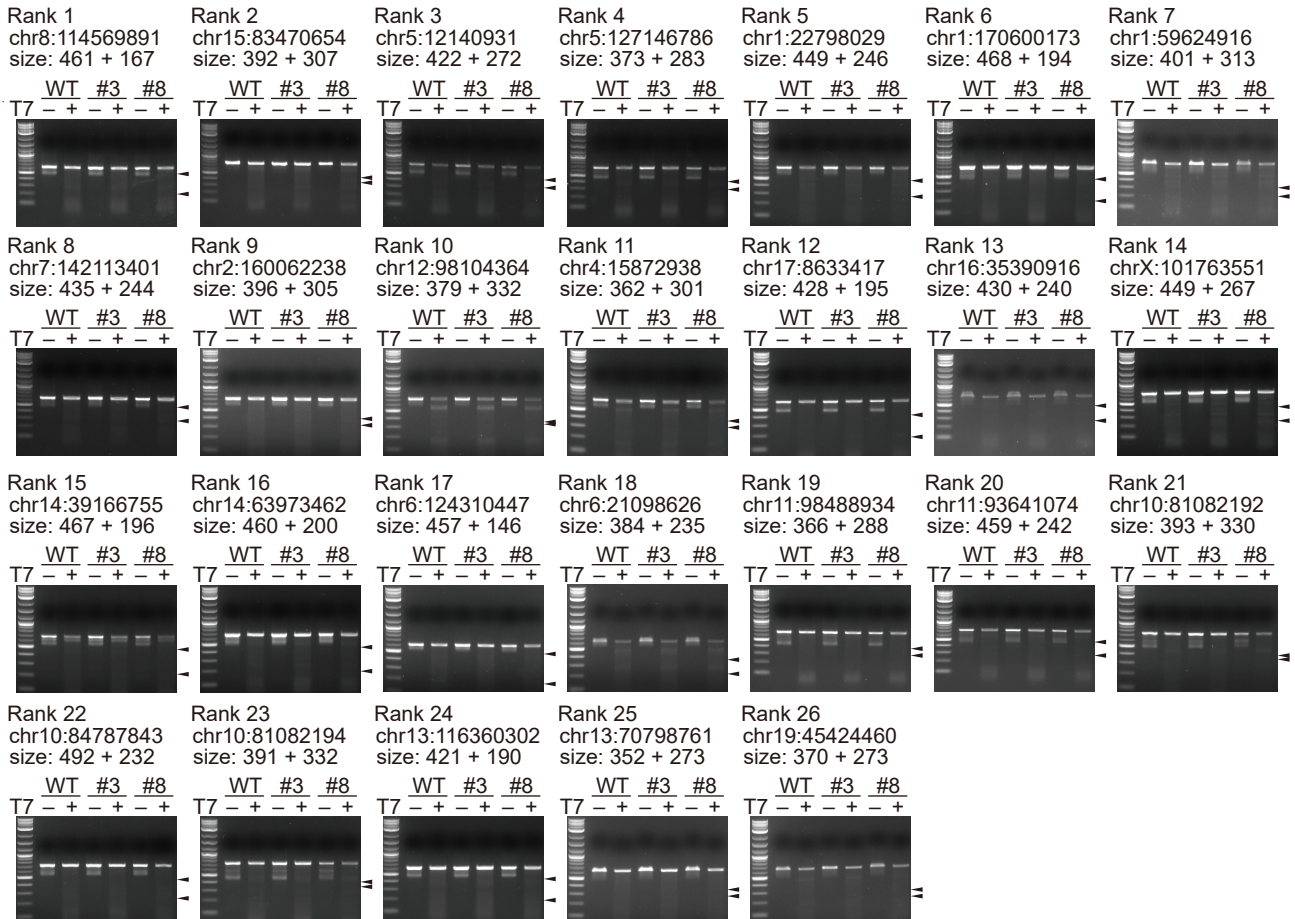

### Supplementary Figure 3. Off-target analyses of crRNA-derived cleavage.

The off-target candidates induced by crRNA were identified using CAS-OFFinder. The tail DNA from wild-type and G3SEKO mice was mixed in equimolar ratios to generate PCR templates. The regions flanking the candidate sites were amplified by PCR, and the off-target insertion/deletion was determined using the T7 Endonuclease mismatch detection method. Arrowheads indicate the predicted cleavage sites. **a** The positive control of T7 endonuclease mismatch detection method. Template DNA was extracted from the tail of mutant mice generated by single crRNA. **b-c** T7 assay results for the off-target candidates of upstream (**b**) and downstream (**c**) crRNAs. Uncropped gel photos are provided as a Source Data file.

# Supplementary Figure 4

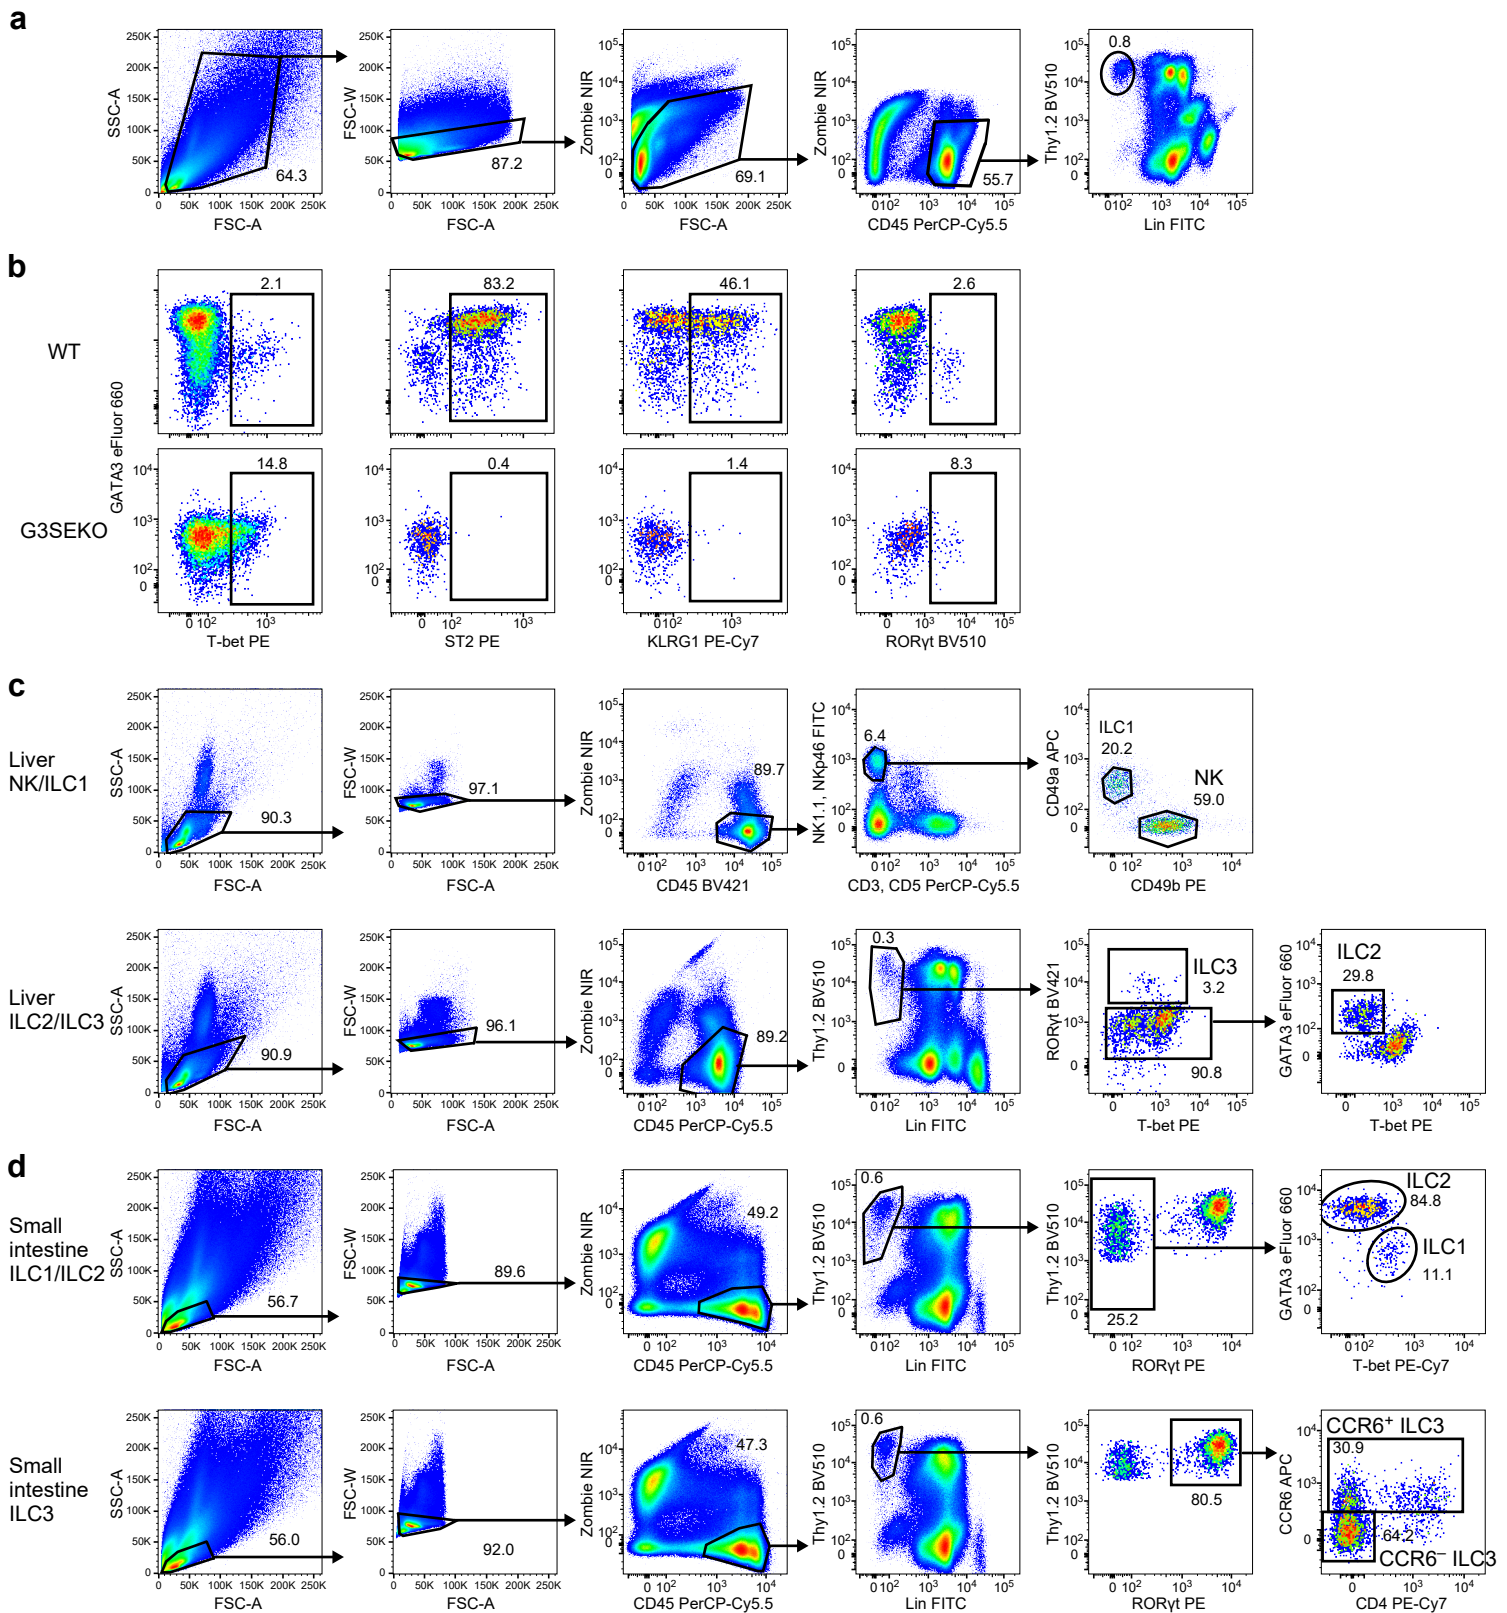

## Supplementary Figure 4. Gating strategies for lung, liver, and small intestinal ILCs.

**a-b** Gating strategy for lung ILCs (**a**) and ILC2 (**b**). Lin: CD3 $\epsilon$ , CD4, CD5, CD8a, CD11b, CD11c, CD19, CD49b, Gr1, B220, Ter119. **c** Gating strategy for liver NK cells and ILC1 (upper panels) and ILC2 and ILC3 (lower panels). Lin: CD3 $\epsilon$ , CD4, CD5, CD8a, CD11b, CD11c, CD19, Gr1, B220, Ter119. **d** Gating strategy for small intestinal ILC1/ILC2 (upper panel) and ILC3 (lower panel). Lin: CD3 $\epsilon$ , CD5, CD8a, CD11b, CD11c, CD19, Gr1, B220, Ter119.

# Supplementary Figure 5

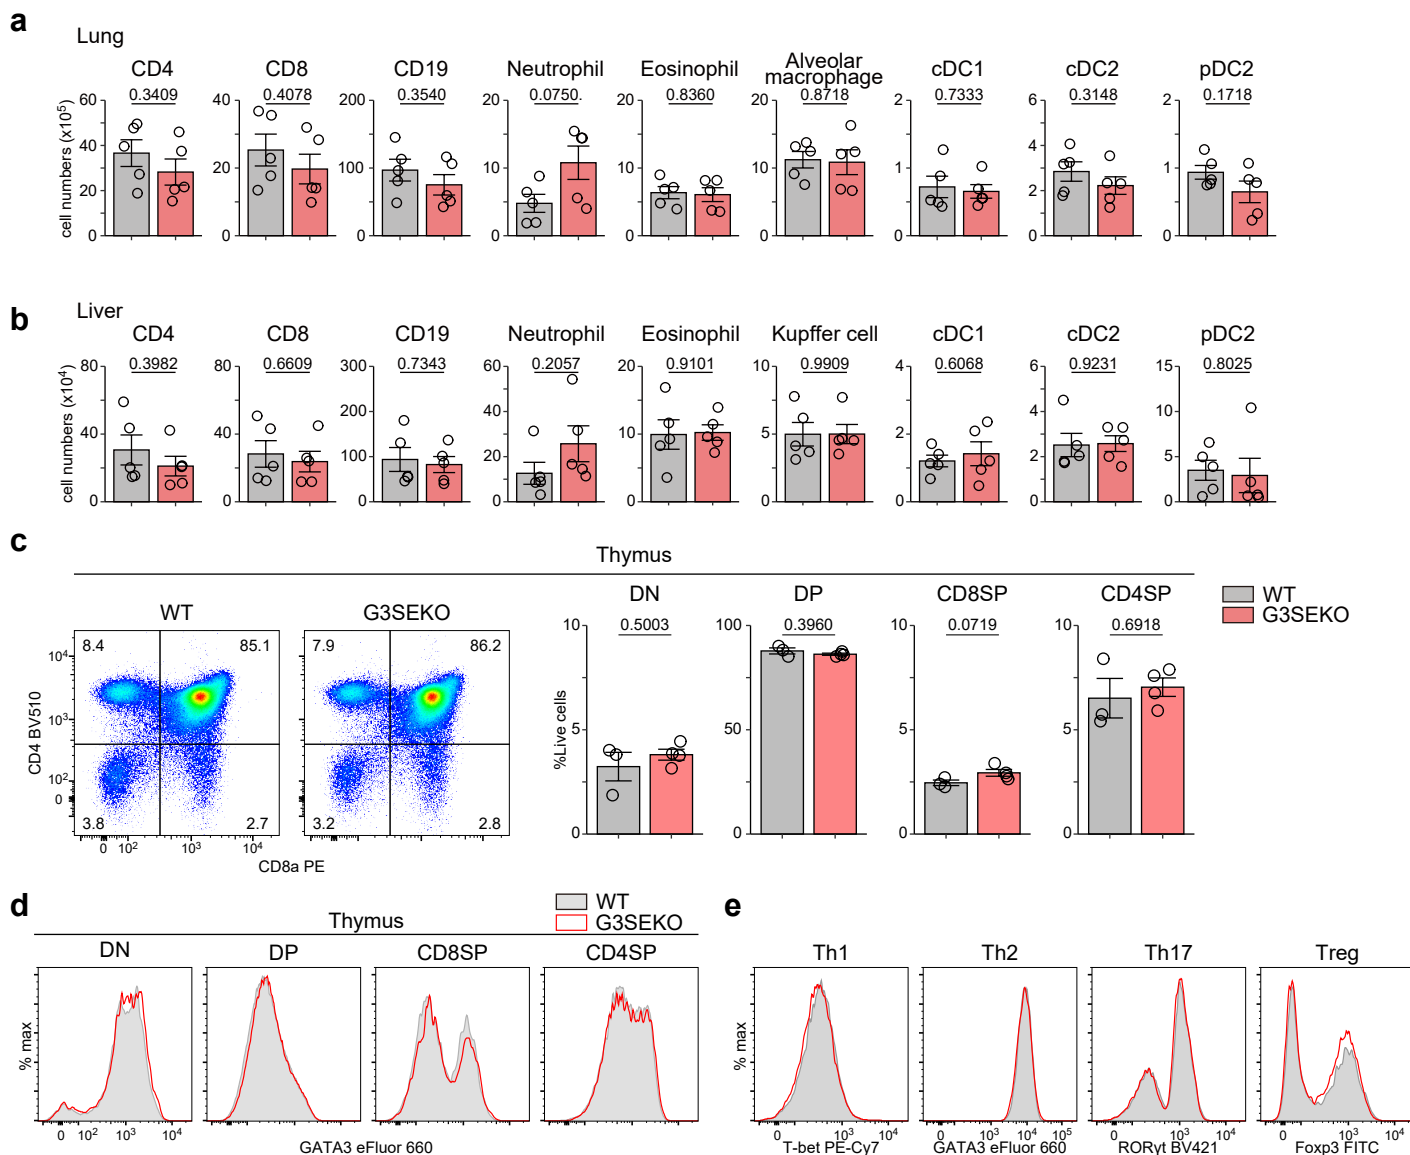

## Supplementary Figure 5. Immune cell development and helper T cell differentiation in G3SEKO mice.

**a-b** Distribution of lymphocytes and myeloid populations in the lung (**a**) and the liver (**b**) of WT and G3SEKO mice.  $n=5$ . **c** Flow cytometry analysis of thymocytes in WT ( $n=3$ ) and G3SEKO ( $n=4$ ) mice. DN: double negative, DP: double positive, SP: single positive. **d** GATA3 expression in thymocytes. **e** Naïve CD4 T cells were cultured under T cell subset-polarizing conditions for three days, and master transcription factor expression was analyzed. (**a-c**), Each data point indicates one mouse from two independent experiments. Data are presented as mean $\pm$ SE. Statistical analysis was performed using unpaired, two-sided Welch's t-test. p values are shown on the graphs. (**d-e**) Shown are representative of six WT mice and five G3SEKO mice from two independent experiments. Source data are provided as a Source Data file.

## Supplementary Figure 6

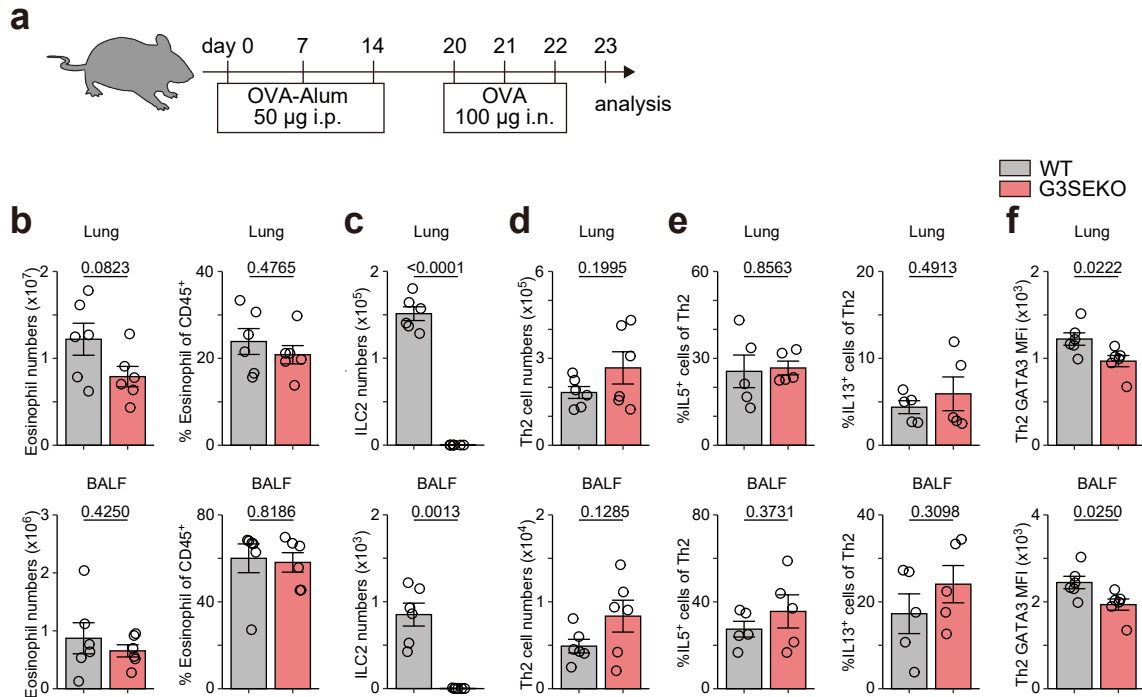

### Supplementary Figure 6. OVA-induced allergic airway inflammation in G3SEKO mice.

**a** Scheme of OVA-induced asthma model. **b** Eosinophil inflammation in lung and bronchoalveolar lavage fluid (BALF). **c** Cell numbers of ILC2s (Lin<sup>-</sup>Thy1.2<sup>+</sup>ST2<sup>+</sup> cells). **d** Cell numbers of Th2 cells (CD3e<sup>+</sup>CD4<sup>+</sup>ST2<sup>+</sup> cells). **e** IL-5 and IL-13 expression of Th2 cells. **f** GATA3 expression of Th2 cells. **b-f** Each data point indicates one mouse from three (**b-d, f**, n=6) or two (**e**, n=5) independent experiments. Data are presented as mean $\pm$ SE. Statistical analysis was performed using unpaired, two-sided Welch's t-test. p values are shown on the graphs. Source data are provided as a Source Data file.

# Supplementary Figure 7

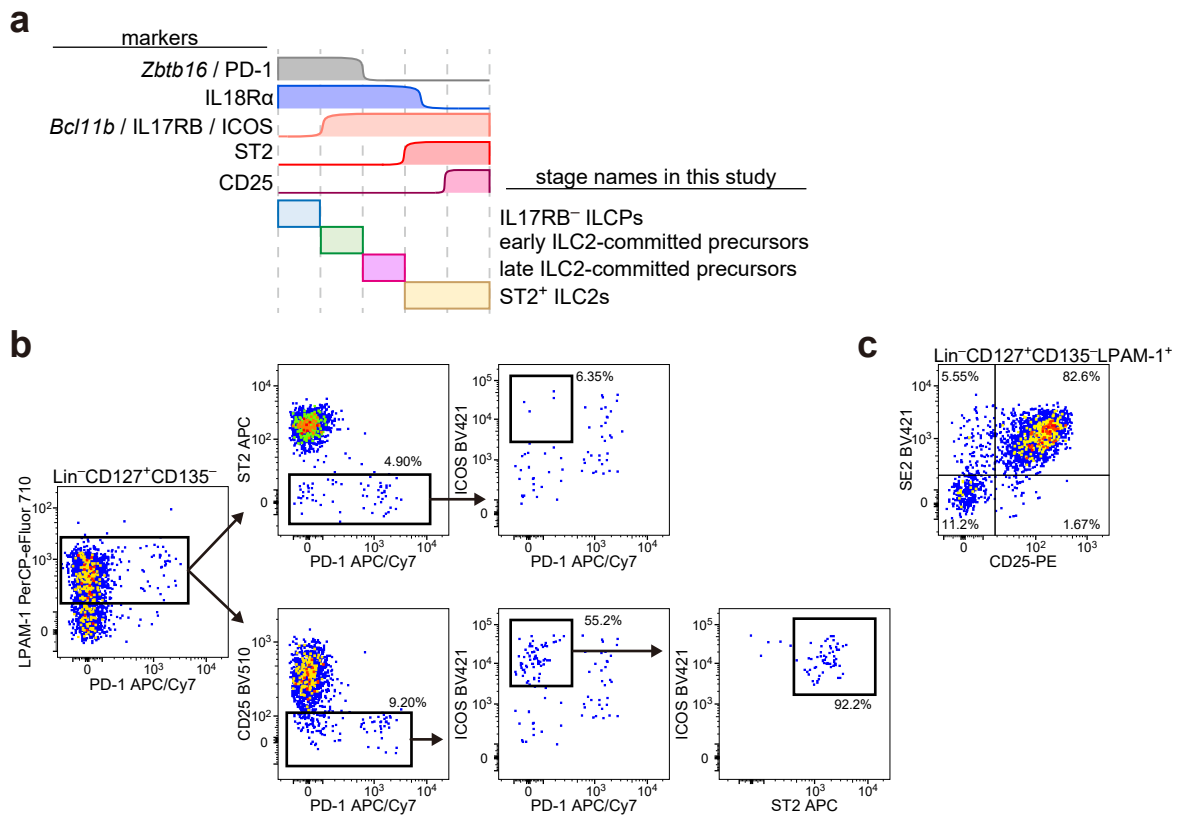

## Supplementary Figure 7. ILC2 lineages in the BM.

**a** The terms of ILC2 lineages in the BM in this study. **b** Flow cytometry analysis of WT BM cells for the late ILC2-committed precursors. **c** Flow cytometry analysis of ST2 and CD25 of WT Lin<sup>-</sup>CD127<sup>+</sup>CD135<sup>-</sup>LPAM-1<sup>+</sup> BM cells. The plots are representative of two independent experiments (**b-c**).



## Supplementary Figure 8

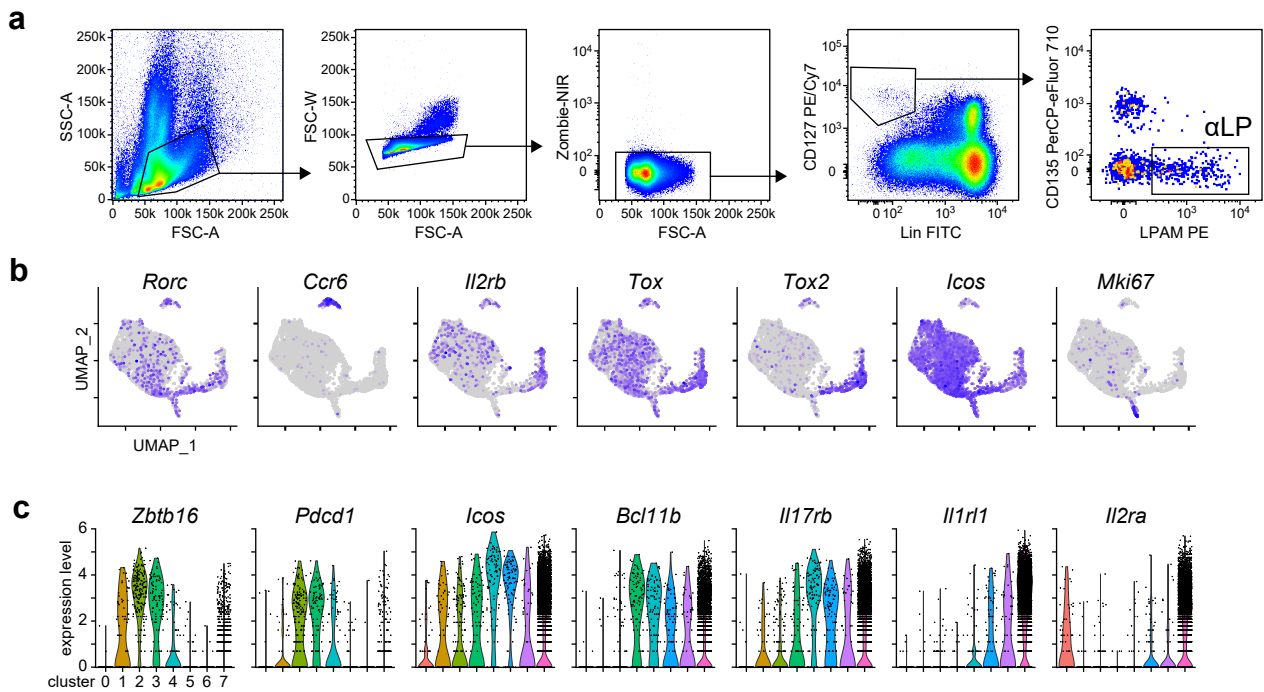

### Supplementary Figure 8. Gating strategies and the expression of ILC-related genes.

**a** Gating strategy of  $\alpha$ LP-sorting for scRNA-seq experiments. Lin: CD3 $\epsilon$ , CD4, CD5, CD8a, CD11b, CD11c, CD19, CD49b, Gr1, B220, Ter119. **b-c** Feature plots (**b**) and violin plots (**c**) show the expression of ILC development-related genes.

# Supplementary Figure 9

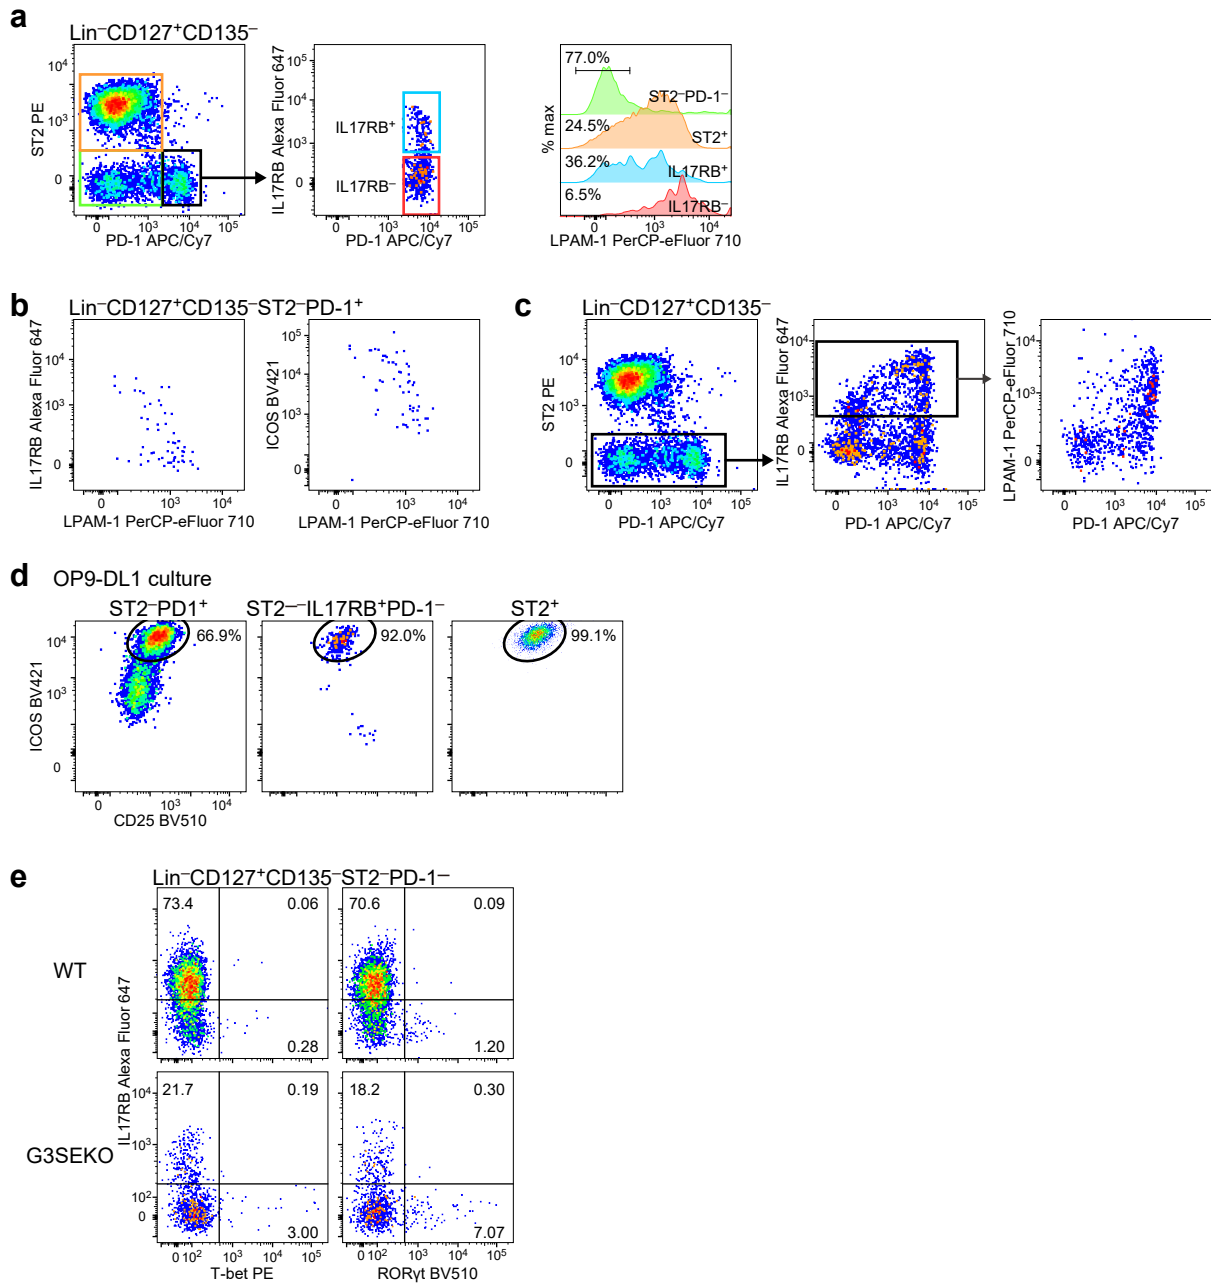

## Supplementary Figure 9. Analysis of late ILC2-committed precursors in the BM.

**a** Flow cytometry analyses of LPAM expression in Lin<sup>-</sup>CD127<sup>+</sup>CD135<sup>-</sup> cells in WT BM. **b** Relationship between LPAM-1 expression and IL17RB or ICOS expression in WT PD-1<sup>+</sup> ILCPs. **c** Relationship between PD-1 expression and LPAM-1 expression in WT ST2-IL17RB<sup>+</sup> cells. **d** Indicated cells were sorted from the WT Lin<sup>-</sup>CD127<sup>+</sup>CD135<sup>-</sup> BM cells and were cultured on OP9-DL1 cells in the presence of IL-7 and SCF for 5 days. Flow cytometry analysis of cultured cells. **e** Flow cytometry analyses of Lin<sup>-</sup>CD127<sup>+</sup>ST2<sup>-</sup>PD-1<sup>-</sup> BM cells. Lin: CD3ε, CD4, CD5, CD8a, CD11b, CD11c, CD19, CD49b, CD135, Gr1, B220, Ter119. The plots were representative of four (**a-d**) and two (**e**) mice from two independent experiments.

# Supplementary Figure 10

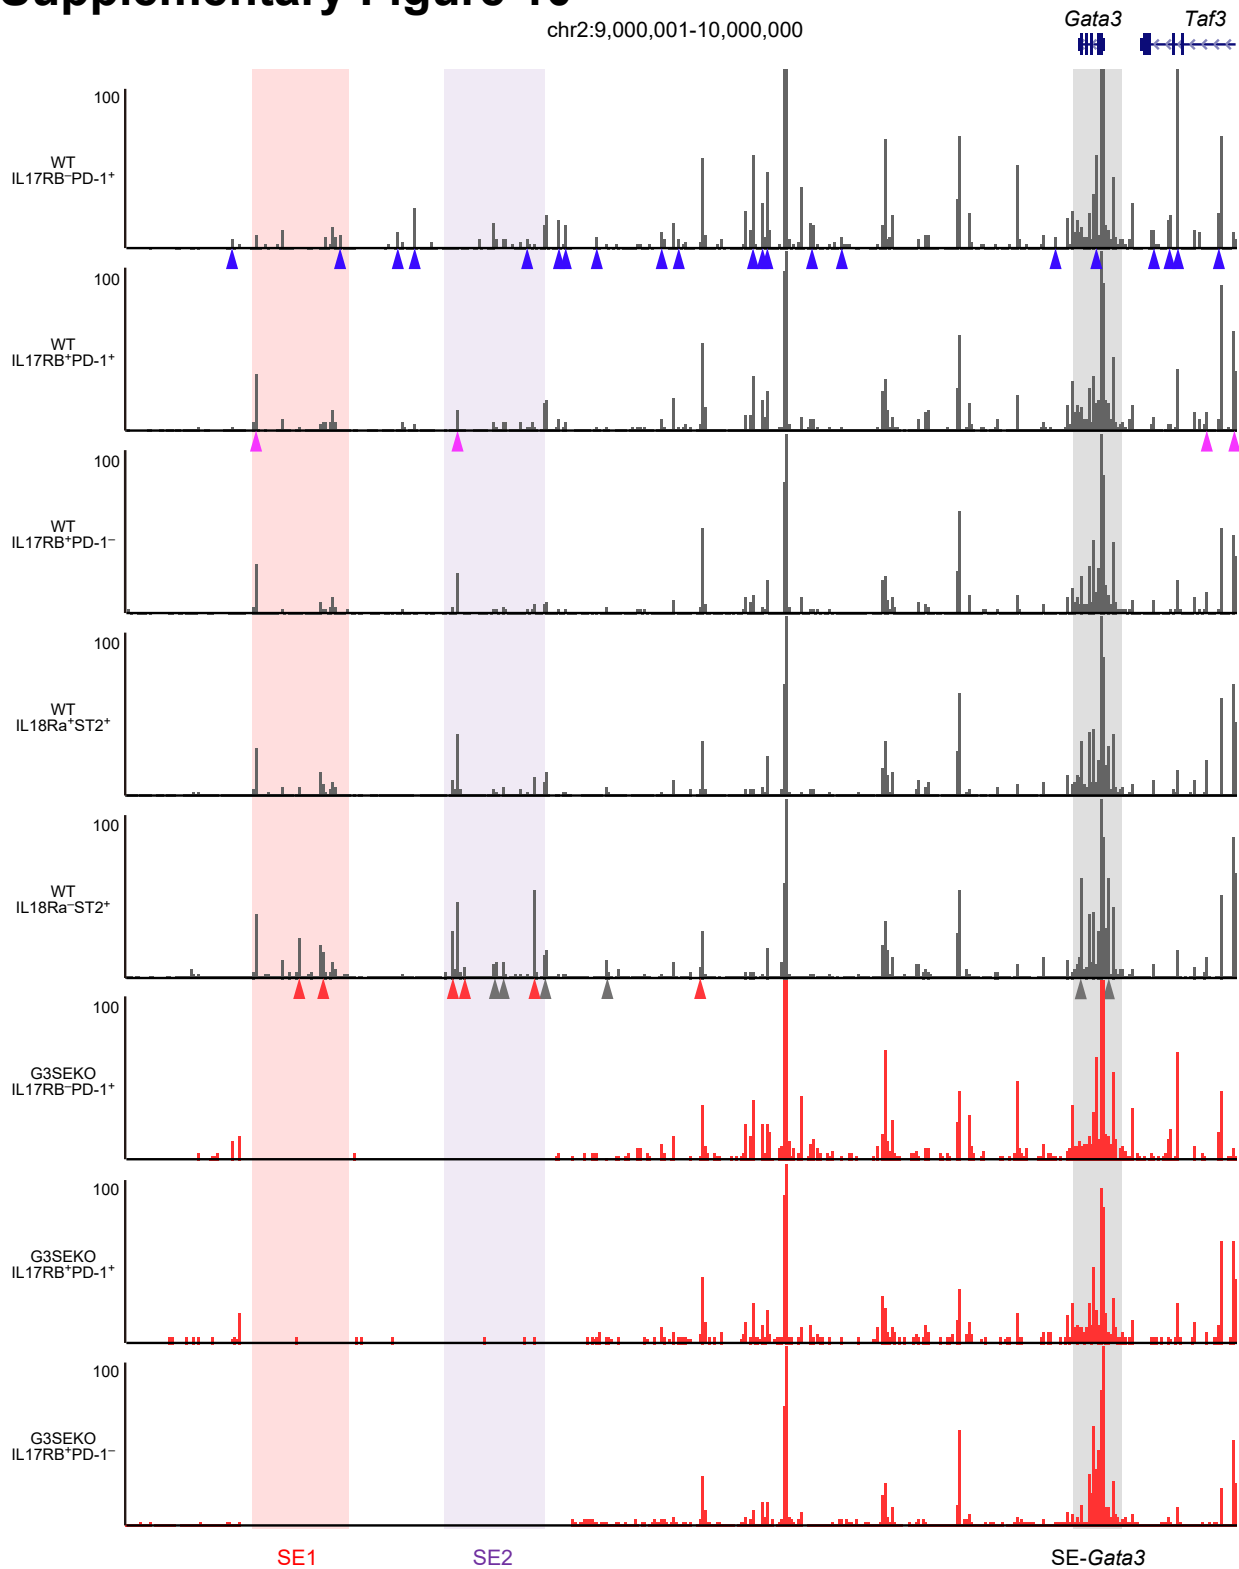

**Supplementary Figure 10. ATAC-seq of ILC2 lineages in the BM of WT and G3SEKO mice.** ATAC-seq was performed for IL17RB<sup>-</sup> ILCP, early and late ILC2-committed precursors, IL18Rα<sup>+</sup>ST2<sup>+</sup> ILC2 and IL18Rα<sup>-</sup>ST2<sup>+</sup> ILC2 from WT BM cells and IL17RB<sup>-</sup> ILCP, early and late ILC2-committed precursors from G3SEKO BM cells. Red, purple, and grey arrowheads indicate open chromatin regions; red arrow heads indicate late opened chromatin, purple arrowheads indicate early opened chromatin, and blue arrowheads indicate closed chromatin during ILC2 development.

# Supplementary Figure 11

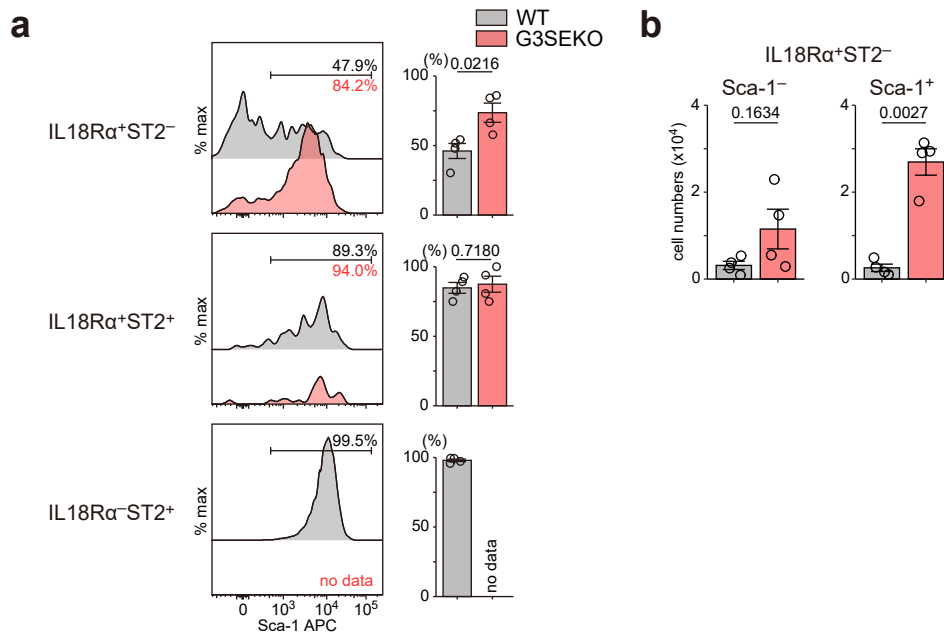

## Supplementary Figure 11. Sca-1 expression of lung ILC2 lineages.

**a**, Sca-1 expression of indicated cells in the lung. n=4. Data were representative of four mice from three independent experiments. **b**, Cell numbers of IL18Rα<sup>+</sup>ST2<sup>-</sup>Sca-1<sup>-</sup> cells and IL18Rα<sup>+</sup>ST2<sup>-</sup>Sca-1<sup>+</sup> cells. (**a**, **b**) Data are presented as mean±SE. Statistical analysis was performed using unpaired, two-sided Welch's t-test. p values are shown on the graphs. Source data are provided as a Source Data file.

# Supplementary Figure 12

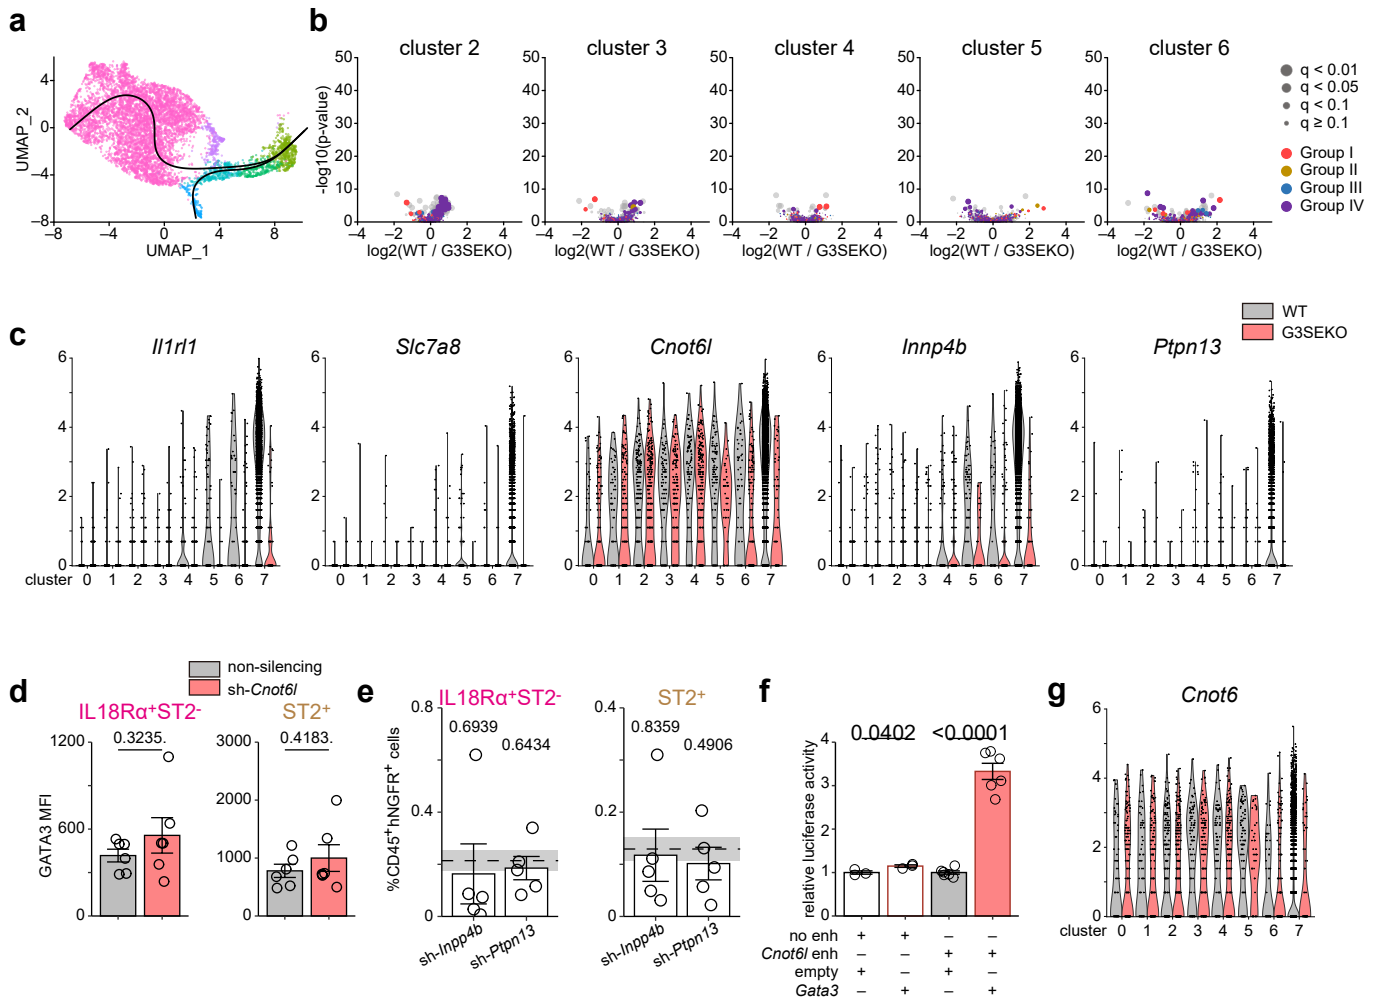

## Supplementary Figure 12. Supporting data related to Fig. 5.

**a** Pseudotime analysis for clusters 2-7 by slingshot. **b** Differentially expressed genes between WT and G3SEKO cells in cluster 2 to cluster 6. **c** Expression of the candidate genes, related to Fig. 5f. **d** Gata3 expression of sh-*Cnot6l* transduced *IL18Rα<sup>+</sup>ST2<sup>-</sup>* cells and *ST2<sup>+</sup>* cells in the lung, related to Fig. 5h. n=6. **e** Lung ILC frequency (*CD45<sup>+</sup>hNGFR<sup>+</sup>Lin<sup>-</sup>Thy1.2<sup>+</sup>* cells) in *CD45<sup>+</sup>hNGFR<sup>+</sup>* cells, related to Fig. 5h. Dash lines and grey areas indicate the mean and SE of non-silencing samples, respectively. Statistical analysis were performed between indicated shRNA-transduced cells and non-silencing vector-transduced cells. n=5. **f** Dual-luciferase Reporter Assay for the *Cnot6l* enhancer region in 293T cells transiently transduced with MSCV-empty vector or MSCV *Gata3* vector. no enhancer: n=3, *Cnot6l* enhancer n=6. **g** Expression of *Cnot6* by scRNA-seq analysis. Each data point indicates one mouse from four (**d**, **e**) and two (**f**) independent experiments. (**d-f**) Data are presented as mean±SE. Statistical analysis was performed using unpaired, two-sided Welch's t-test. p values are shown on the graphs. Source data are provided as a Source Data file.

**Supplementary Table 1. The list of oligonucleotides**

| <b>name</b>                     | <b>sequence</b>                                                                                           |
|---------------------------------|-----------------------------------------------------------------------------------------------------------|
| G3SEKO 5' crRNA                 | Alt-R1/AGUGCUAACAGAAUACGCUC/Alt-R2                                                                        |
| G3SEKO 3' crRNA                 | Alt-R1/GGUGACAUUAAACUGCACAC/Alt-R2                                                                        |
| G3SEKO genotype forward primer  | GACCCTTTAGTTTAGCTCCTTGC                                                                                   |
| G3SEKO genotype reverse primer  | CTCACCATGGAACTTACAGCTC                                                                                    |
| G3SEWT genotype forward primer  | GCTGGATAGAAGGCTGACTCATA                                                                                   |
| G3SEWT genotype reverse primer  | ATGGGGTACAATGCTAAACAGAA                                                                                   |
| G3SE2KO 5' crRNA                | Alt-R1/AGUGCUAACAGAAUACGCUC/Alt-R2                                                                        |
| G3SE2KO 3' crRNA                | Alt-R1/GUGGAGGUGGUUACCCAAC/Alt-R2                                                                         |
| G3SE2KO genotype forward primer | TATTCTCCCTTGTGGTCAATCC                                                                                    |
| G3SE2KO genotype reverse primer | CAATGTCTCCACTATGCTCCAG                                                                                    |
| G3SE2WT genotype forward primer | GCTGGAGTGGTAAGGAGCAG                                                                                      |
| G3SE2WT genotype reverse primer | GGAGCCTTGAGTCCTGAGTG                                                                                      |
| miR-30 common forward primer    | CAGAAGGCTCGAGAAGGTATATTGCTGTTGACAGTGAGCG                                                                  |
| miR-30 common reverse primer    | CTAAGTAGCCCCTTGAATTCGAGGCAGTAGGCA                                                                         |
| shRNA targeting <i>Ptpn13</i>   | TGCTGTTGACAGTGAGCGTTGCTACCAGAAATCGATACTAT<br>AGTGAAGCCACAGATGTATAGTATCGATTTCTGGTAGCACT<br>GCCTACTGCCTCGGA |
| shRNA targeting <i>Sptssa</i>   | TGCTGTTGACAGTGAGCGCGCATTTCACGTTGTGATAAAT<br>AGTGAAGCCACAGATGTATTTATCACACGTGCAAATGCAT<br>GCCTACTGCCTCGGA   |
| shRNA targeting <i>Cnot6l</i>   | TGCTGTTGACAGTGAGCGATGGAAACAGAGCAATACTTTAT<br>AGTGAAGCCACAGATGTATAAAGTATTGCTCTGTTTCCACT<br>GCCTACTGCCTCGGA |
| shRNA targeting <i>Inpp4b</i>   | TGCTGTTGACAGTGAGCGTAACTGCATTATCGCTAAAGTAT<br>AGTGAAGCCACAGATGTATACTTTAGCGATAATGCAGTTCT<br>GCCTACTGCCTCGGA |
| shRNA targeting <i>Tespa1</i>   | TGCTGTTGACAGTGAGCGAATCTCGTATCCCTGCAAGATTT<br>AGTGAAGCCACAGATGTAAATCTTGCAGGGATACGAGATGT<br>GCCTACTGCCTCGGA |
| ATAC-seq universal primer Ad1   | AATGATACGGCGACCACCGAGATCTACACTCGTCGGCAGC<br>GTCAGATGTG                                                    |
| ATAC-seq index primer Ad2.1     | CAAGCAGAAGACGGCATAACGAGATTCGCCTTAGTCTCGTG<br>GGCTCGGAGATGT                                                |
| ATAC-seq index primer Ad2.2     | CAAGCAGAAGACGGCATAACGAGATCTAGTACGGTCTCGTG<br>GGCTCGGAGATGT                                                |
| ATAC-seq index primer Ad2.3     | CAAGCAGAAGACGGCATAACGAGATTTCTGCCTGTCTCGTGG<br>GCTCGGAGATGT                                                |
| ATAC-seq index primer Ad2.4     | CAAGCAGAAGACGGCATAACGAGATGCTCAGGAGTCTCGTG<br>GGCTCGGAGATGT                                                |
| ATAC-seq index primer Ad2.5     | CAAGCAGAAGACGGCATAACGAGATAGGAGTCCGTCTCGTG<br>GGCTCGGAGATGT                                                |
| Off-target upstream Rank1_F     | TTTGGAGGTTTGGCTTCCCTA                                                                                     |
| Off-target upstream Rank1_R     | ATCAAAGTGGACCTGGTTGC                                                                                      |
| Off-target upstream Rank2_F     | TGTCCAATGGCAGACTTCAA                                                                                      |
| Off-target upstream Rank2_R     | GGTGGTCAGTGTCCATCAGA                                                                                      |
| Off-target upstream Rank3_F     | CATAGGGGACTTTTCGGGATAA                                                                                    |
| Off-target upstream Rank3_R     | TCACTGGGTGTCCCACTAA                                                                                       |
| Off-target upstream Rank4_F     | GGCAGTAGATTCTGGGATG                                                                                       |
| Off-target upstream Rank4_R     | TGCTACCGCTGAAAAGGTC                                                                                       |
| Off-target upstream Rank5_F     | TGAGGTTCCCATCACTACG                                                                                       |
| Off-target upstream Rank5_R     | GAGACGTGTTGCATCAAGGA                                                                                      |
| Off-target upstream Rank6_F     | AGAATCGAAGTTGGCACACC                                                                                      |
| Off-target upstream Rank6_R     | ACCCCATCTCCCAATTAAC                                                                                       |
| Off-target upstream Rank7_F     | CAGTGCCAGTTCCAAGACAG                                                                                      |

|                                |                       |
|--------------------------------|-----------------------|
| Off-target upstream Rank7 R    | TGTAGCCCCAAGGAATTCTG  |
| Off-target downstream Rank1 F  | ATGTGTGCGTGTGGATGAGT  |
| Off-target downstream Rank1 R  | TGGGATCTAGGCATCTGGAG  |
| Off-target downstream Rank2 F  | AAGCCCAAGTTCAGTCCTCA  |
| Off-target downstream Rank2 R  | AGGTCCCCTCTGTCACCTTT  |
| Off-target downstream Rank3 F  | GTGTTGGGGGAGTGGATAGA  |
| Off-target downstream Rank3 R  | TGTCAACAGAGCCACTTTTCG |
| Off-target downstream Rank4 F  | GTGGCATGTGCCATCTGTAG  |
| Off-target downstream Rank4 R  | ATTTCCAGTCAGCGGTTGTC  |
| Off-target downstream Rank5 F  | CTTCATCAGGGACTGCTCCT  |
| Off-target downstream Rank5 R  | CCCCCTGCCTCAACTTATTT  |
| Off-target downstream Rank6 F  | GAGCTGCCTCTGCAAACCTCT |
| Off-target downstream Rank6 R  | AACTCTGGGGCATCTGATTG  |
| Off-target downstream Rank7 F  | GGCTCACAACCACCCATAAC  |
| Off-target downstream Rank7 R  | AAGGCACATGGATGAAAAGG  |
| Off-target downstream Rank8 F  | CCTGTGTGTGTATGCGTGTG  |
| Off-target downstream Rank8 R  | GGGGTTCCAGTGTACAGAA   |
| Off-target downstream Rank9 F  | CCACTCGTCCCACGTACTION |
| Off-target downstream Rank9 R  | TGGGTGCGTCTAAAGTGTGA  |
| Off-target downstream Rank10 F | TTCTGTGCCCTTTTGCTCTT  |
| Off-target downstream Rank10 R | CCCCAATCCACTTCTCTCA   |
| Off-target downstream Rank11 F | CCCTCCCTCCCTGTTTTCTA  |
| Off-target downstream Rank11 R | TTCATCCCACCTGCTTTTTTC |
| Off-target downstream Rank12 F | CGAGGGAAGGAATGTTTGAA  |
| Off-target downstream Rank12 R | TATGCACGGCTAGTCAGCAC  |
| Off-target downstream Rank13 F | TGGCTCAGTGCATAAAGGTG  |
| Off-target downstream Rank13 R | TTTTGTCTTTCTCCCCGAAA  |
| Off-target downstream Rank14 F | CCAAGTGGCAGATTCCTTA   |
| Off-target downstream Rank14 R | GGGATCTGACACCGTCATCT  |
| Off-target downstream Rank15 F | TCTGTGCGAGTGTGTGAGTG  |
| Off-target downstream Rank15 R | GAAGCATCCTGAGCCATTA   |
| Off-target downstream Rank16 F | GCTCAGCTCAGCTACCTGCT  |
| Off-target downstream Rank16 R | CCCTATTTGTCCTGCTCTGC  |
| Off-target downstream Rank17 F | TGTCACCGTCCTTTTAGCC   |
| Off-target downstream Rank17 R | TAGCACTGTTTGGGGAGGT   |
| Off-target downstream Rank18 F | TCACCCTGACCAGTGAAAAA  |
| Off-target downstream Rank18 R | AATGGTGCTTGGATTGGAAG  |
| Off-target downstream Rank19 F | TGTTTGATTGCTGCTGCTCT  |
| Off-target downstream Rank19 R | TGCCAAGAAATGGAGAAACC  |
| Off-target downstream Rank20 F | TTTGACTIONAAGCCCCAGA  |
| Off-target downstream Rank20 R | AGCTGCAGGAGAAAGAGGTG  |
| Off-target downstream Rank21 F | AGGTTGGCATGGACTACAGG  |
| Off-target downstream Rank21 R | TGCATGTGCTCACTGTCTGA  |
| Off-target downstream Rank22 F | CTTCATGGGGAGCAGTGTTT  |
| Off-target downstream Rank22 R | CTCCAGGTGTATGGCATGAA  |
| Off-target downstream Rank23 F | AGGTTGGCATGGACTACAGG  |
| Off-target downstream Rank23 R | TGCATGTGCTCACTGTCTGA  |
| Off-target downstream Rank24 F | AGGTTTCTGCAAAGCTTGA   |
| Off-target downstream Rank24 R | AAAGCAATGTGTGGTGGTTTC |
| Off-target downstream Rank25 F | GGACTTGCAGAGCAGGACTC  |
| Off-target downstream Rank25 R | CCACGTGCCTGTTTATGTAT  |
| Off-target downstream Rank26 F | TGTGTGCAGGTGTGTGAAGA  |
| Off-target downstream Rank26 R | TCCCCTACTGATCCGAATGT  |

**Supplementary Table 2. The list of antibodies**

| <b>Antibodies</b>                                                   | <b>Company</b>           |
|---------------------------------------------------------------------|--------------------------|
| Rat anti-mouse CD3 $\epsilon$ FITC (Clone 145-2C11)                 | BioLegend                |
| Rat anti-mouse CD3 $\epsilon$ PE (Clone 145-2C11)                   | BioLegend                |
| Rat anti-mouse CD3 $\epsilon$ PerCP/Cyanine5.5 (Clone 145-2C11)     | BioLegend                |
| Rat anti-mouse CD3 $\epsilon$ Brilliant Violet 510 (Clone 145-2C11) | BioLegend                |
| Rat anti-mouse CD4 FITC (Clone RM4-5)                               | BioLegend                |
| Rat anti-mouse CD4 PE (Clone RM4-5)                                 | BioLegend                |
| Rat anti-mouse CD4 PE/Cyanine7 (Clone RM4-5)                        | BioLegend                |
| Rat anti-mouse CD4 Brilliant Violet 510 (Clone RM4-5)               | BioLegend                |
| Rat anti-mouse CD5 FITC (Clone 53-7.3)                              | BioLegend                |
| Rat anti-mouse CD5 PerCP/Cyanine5.5 (Clone 53-7.3)                  | BioLegend                |
| Rat anti-Mouse CD8a FITC (Clone 53-6.7)                             | BD Bioscience            |
| Rat anti-Mouse CD8a PE (Clone 53-6.7)                               | BD Bioscience            |
| Rat anti-Mouse CD8a PE/Cyanine7 (Clone 53-6.7)                      | BioLegend                |
| Rat anti-mouse/human CD11b FITC (Clone M1/70)                       | BioLegend                |
| Rat anti-mouse/human CD11b Pe/Cyanine7 (Clone M1/70)                | BioLegend                |
| Hamster anti-mouse CD11c FITC (Clone N418)                          | BioLegend                |
| Hamster anti-mouse CD11c PE/Cyanine7 (Clone N418)                   | BioLegend                |
| Purified anti-mouse CD16/32 (Clone 93)                              | BioLegend                |
| Rat anti-mouse CD19 FITC (Clone 6D5)                                | BioLegend                |
| Rat anti-mouse CD25 PE (Clone PC61)                                 | BioLegend                |
| Rat anti-mouse CD25 Brilliant Violet 421 (Clone PC61)               | BioLegend                |
| Rat anti-mouse CD25 Brilliant Violet 510 (Clone PC61)               | BioLegend                |
| Rat anti-mouse CD44 PerCP-Cy5.5 (Clone IM7)                         | BD Bioscience            |
| Rat anti-mouse/human CD45R/B220 FITC (Clone RA3-6B2)                | BioLegend                |
| Rat anti-mouse/human CD45R/B220 Brilliant Violet (Clone RA3-6B2)    | BioLegend                |
| Rat anti-mouse CD45 PerCP/Cyanine5.5 (Clone 30-F11)                 | BioLegend                |
| Rat anti-mouse CD45 BV421 (Clone 30-F11)                            | BD Bioscience            |
| Mouse anti-mouse CD45.1 FITC (Clone A20)                            | BioLegend                |
| Mouse anti-mouse CD45.1 PerCP/Cyanine5.5 (Clone A20)                | BioLegend                |
| Mouse anti-mouse CD45.1 APC (Clone A20)                             | BioLegend                |
| Mouse anti-mouse CD45.1 Brilliant Violet 605 (Clone A20)            | BioLegend                |
| Mouse anti-mouse CD45.2 APC/Cyanine7 (Clone 104)                    | BioLegend                |
| Mouse anti-mouse CD45.2 Brilliant Violet 510 (Clone 104)            | BioLegend                |
| Mouse anti-mouse CD45.2 Brilliant Violet 785 (Clone 104)            | BioLegend                |
| Hamster anti-mouse CD49a APC (Clone HM $\alpha$ 1)                  | BioLegend                |
| Rat anti-mouse CD49b FITC (Clone DX5)                               | BioLegend                |
| Rat anti-mouse CD49b PE (Clone DX5)                                 | BioLegend                |
| Rat anti-mouse CD62L PE (Clone MEL-14)                              | Thermo Fisher Scientific |
| Rat anti-mouse CD90.2 PerCP/Cyanine5.5 (Clone 53-2.1)               | BioLegend                |
| Rat anti-mouse CD90.2 PE/Cyanine7 (Clone 53-2.1)                    | BioLegend                |
| Rat anti-mouse CD90.2 Brilliant Violet 510 (Clone 53-2.1)           | BioLegend                |
| Rat anti-mouse CD103 PE/Cyanine7 (Clone 2E7)                        | BioLegend                |
| Rat anti-mouse CD127 PE/Cyanine7 (Clone A7R34)                      | BioLegend                |
| Rat anti-mouse CD127 BV421 (Clone SB/199)                           | BD Bioscience            |
| Mouse anti-mouse CD135 PerCP-eFluor 710 (Clone A2F10)               | Thermo Fisher Scientific |
| Rat anti-mouse CD135 biotin (Clone A2F10)                           | BioLegend                |
| Hamster anti-mouse CD196 (CCR6) PE (Clone 29-2L17)                  | BioLegend                |
| Hamster anti-mouse CD196 (CCR6) APC (Clone 29-2L17)                 | BioLegend                |
| Rat anti-mouse CD218a (IL-18R $\alpha$ ) PE (Clone A17071D)         | BioLegend                |
| Mouse anti-human CD271(NGFR) PerCP-Cy5.5 (Clone C40-1457)           | BD Bioscience            |



|                                                                                |                          |
|--------------------------------------------------------------------------------|--------------------------|
| Mouse anti-human CD271 (NGFR) V450 (Clone C40-1457)                            | BD Bioscience            |
| Hamster anti-human/mouse/rat CD278 (ICOS) Brilliant Violet 421 (Clone C398.4A) | BioLegend                |
| Rat anti-mouse CD279 PE/Cyanine7 (Clone 29F.1A12)                              | BioLegend                |
| Rat anti-mouse CD279 PerCP/Cyanine5.5 Antibody (Clone 29F.1A12)                | BioLegend                |
| Mouse anti-mouse CD279 APC/Cyanine7 (Clone EH12.2H7)                           | BioLegend                |
| Rat anti-mouse CD335 FITC (Clone 29A1.4)                                       | BioLegend                |
| Mouse anti-mouse/human GATA-3 eFluor 660 (Clone TWAJ)                          | Thermo Fisher Scientific |
| Mouse anti-mouse/human GATA-3 PE/Cyanine7 (Clone TWAJ)                         | Thermo Fisher Scientific |
| Mouse anti-mouse GATA3 Alexa Fluor 647 (Clone L50-823)                         | BD Bioscience            |
| Rat anti-mouse I-A/I-E PerCP/Cyanine5.5 (Clone M5/114.15.2)                    | BioLegend                |
| Rat anti-mouse Ly6A/E (Sca-1) PE (Clone E13-161-7)                             | BD Bioscience            |
| Rat anti-mouse Ly6A/E (Sca-1) APC (Clone E13-161-7)                            | BioLegend                |
| Rat anti-mouse Ly-6G/Ly-6C FITC (Clone RB6-8C5)                                | BioLegend                |
| Rat anti-mouse Ly-6G FITC (Clone 1A8)                                          | BioLegend                |
| Rat anti-mouse Ly-6G APC (Clone 1A8)                                           | BioLegend                |
| Rat anti-mouse LPAM-1 PE (Clone DATK32)                                        | BioLegend                |
| Rat anti-mouse LPAM-1 APC (Clone DATK32)                                       | BioLegend                |
| Rat anti-mouse LPAM-1 PerCP-eFluor 710 (Clone DATK32)                          | Thermo Fisher Scientific |
| Hamster anti-mouse/human KLRG1 (MAFA) PE (Clone 2F1/KLRG1)                     | BioLegend                |
| Hamster anti-mouse/human KLRG1 (MAFA) PE/Cyanine7 (Clone 2F1/KLRG1)            | BioLegend                |
| Rat anti-mouse/human IL-5 PE (Clone TRFK5)                                     | BioLegend                |
| Rat anti-mouse IL-13 eFluor 660 (Clone eBio13A)                                | Thermo Fisher Scientific |
| Rat anti-mouse IL-17RB Alexa Fluor 647 (Clone 9B10)                            | BioLegend                |
| Rat anti-mouse IL-17RB PE (Clone 9B10)                                         | BioLegend                |
| Rat anti-mouse IL-33R $\alpha$ (IL1RL1, ST2) PE/Cyanine7 (Clone DIH9)          | BioLegend                |
| Rat anti-mouse IL-33R $\alpha$ (IL1RL1, ST2) APC (Clone DIH9)                  | BioLegend                |
| Rat anti-mouse IL-33R $\alpha$ (IL1RL1, ST2) Brilliant Violet 421 (Clone DIH9) | BioLegend                |
| Hamster anti-mouse PLZF Antibody PE (Clone 9E12)                               | BioLegend                |
| Mouse anti-mouse NK-1.1 (Clone PK136)                                          | BioLegend                |
| Mouse anti-mouse ROR $\gamma$ t PE (Clone Q31-378)                             | BD Bioscience            |
| Mouse anti-mouse ROR $\gamma$ t BV421 (Clone Q31-378)                          | BD Bioscience            |
| Mouse anti-mouse ROR $\gamma$ t BV510 (Clone Q31-378)                          | BD Bioscience            |
| Rat anti-mouse Siglec-F PE (Clone E50-2440)                                    | BD Bioscience            |
| Mouse anti-mouse/human T-bet PE (Clone 4B10)                                   | BioLegend                |
| Mouse anti-mouse/human T-bet PE/Cyanine7 (Clone 4B10)                          | BioLegend                |
| Hamster anti-mouse TCR $\beta$ chain FITC (Clone H57-597)                      | BioLegend                |
| Hamster anti-mouse TCR $\gamma/\delta$ PE (Clone UC7-13D5)                     | BioLegend                |
| Rat anti-mouse TER-119 FITC (Clone TER-119)                                    | BioLegend                |
| TotalSeq-A0302 anti-mouse Hashtag 2                                            | BioLegend                |
| TotalSeq-A0303 anti-mouse Hashtag 3                                            | BioLegend                |
| TotalSeq-A0307 anti-mouse Hashtag 7                                            | BioLegend                |
| TotalSeq-A0308 anti-mouse Hashtag 8                                            | BioLegend                |
| TotalSeq-A0309 anti-mouse Hashtag 9                                            | BioLegend                |
| TotalSeq-A0310 anti-mouse Hashtag 10                                           | BioLegend                |
| TotalSeq-A0311 anti-mouse Hashtag 11                                           | BioLegend                |
| TotalSeq-A0312 anti-mouse Hashtag 12                                           | BioLegend                |
| Anti-mouse CD3 $\epsilon$ antibody (Clone 145-2C11)                            | BioXCell                 |
| Anti-mouse CD28 antibody (Clone 37.51)                                         | BioXCell                 |
| Anti-mouse IFN $\gamma$ antibody (Clone XMG1.2)                                | BioXCell                 |
| Anti-mouse IL-4 antibody (Clone 11B11)                                         | BioXCell                 |
| Anti-H3K27ac antibody (Clone ab4729)                                           | abcam                    |
