# Supplementary material for: Stage-specific GATA3 induction promotes ILC2 development after lineage commitment
Source: PubMed Central journal article supplement (PMC11226602; doi:10.1038/s41467-024-49881-y), 2024-07-05
Supplement: 41467_2024_49881_MOESM3_ESM.pdf [file 41467_2024_49881_MOESM3_ESM.pdf]

## Reporting Summary

Nature Portfolio wishes to improve the reproducibility of the work that we publish. This form provides structure for consistency and transparency in reporting. For further information on Nature Portfolio policies, see our [Editorial Policies](#) and the [Editorial Policy Checklist](#).

### Statistics

For all statistical analyses, confirm that the following items are present in the figure legend, table legend, main text, or Methods section.

- | n/a                                 | Confirmed                                                                                                                                                                                                                                                                                      |
|-------------------------------------|------------------------------------------------------------------------------------------------------------------------------------------------------------------------------------------------------------------------------------------------------------------------------------------------|
| <input type="checkbox"/>            | <input checked="" type="checkbox"/> The exact sample size ( $n$ ) for each experimental group/condition, given as a discrete number and unit of measurement                                                                                                                                    |
| <input type="checkbox"/>            | <input checked="" type="checkbox"/> A statement on whether measurements were taken from distinct samples or whether the same sample was measured repeatedly                                                                                                                                    |
| <input type="checkbox"/>            | <input checked="" type="checkbox"/> The statistical test(s) used AND whether they are one- or two-sided<br><i>Only common tests should be described solely by name; describe more complex techniques in the Methods section.</i>                                                               |
| <input checked="" type="checkbox"/> | <input type="checkbox"/> A description of all covariates tested                                                                                                                                                                                                                                |
| <input checked="" type="checkbox"/> | <input type="checkbox"/> A description of any assumptions or corrections, such as tests of normality and adjustment for multiple comparisons                                                                                                                                                   |
| <input type="checkbox"/>            | <input checked="" type="checkbox"/> A full description of the statistical parameters including central tendency (e.g. means) or other basic estimates (e.g. regression coefficient) AND variation (e.g. standard deviation) or associated estimates of uncertainty (e.g. confidence intervals) |
| <input type="checkbox"/>            | <input checked="" type="checkbox"/> For null hypothesis testing, the test statistic (e.g. $F$ , $t$ , $r$ ) with confidence intervals, effect sizes, degrees of freedom and $P$ value noted<br><i>Give <math>P</math> values as exact values whenever suitable.</i>                            |
| <input checked="" type="checkbox"/> | <input type="checkbox"/> For Bayesian analysis, information on the choice of priors and Markov chain Monte Carlo settings                                                                                                                                                                      |
| <input checked="" type="checkbox"/> | <input type="checkbox"/> For hierarchical and complex designs, identification of the appropriate level for tests and full reporting of outcomes                                                                                                                                                |
| <input checked="" type="checkbox"/> | <input type="checkbox"/> Estimates of effect sizes (e.g. Cohen's $d$ , Pearson's $r$ ), indicating how they were calculated                                                                                                                                                                    |

*Our web collection on [statistics for biologists](#) contains articles on many of the points above.*

### Software and code

Policy information about [availability of computer code](#)

**Data collection** BD FACSCantII, BD LSRFortessa X-20 were used for flow cytometry data collection. SONY SH800, BD FACSMelody and BD FACSAriaII were used for cell sorting. Illumina HiSeq2500 and NextSeq 500 were used for CHIP-seq and ATAC-seq data collection. BD Rhapsody and NovaSeq 6000 were used for TAS-seq (scRNA-seq).

**Data analysis** FlowJo v10.7.1 and v10.8.1. were used for all flow data analysis. Welch's T test was performed using R (v4.2.3) and RStudio (v2022.07.1). ANOVA was performed using lsmeans (2.30-0). CHIP-seq and ATAC-seq data were analyzed using SeqPurge (2019\_09), Bowtie2 (v2.4.2), bedtools (2.30.0), edgeR (3.38.1), Homer (v4.11) and UCSC genome browser. scRNA-seq data was analyzed using Cutadapt (v3.4), Seurat (4.3.0), tidyverse(1.3.1), sctransform (03.5), slingshot (v2.4.0), tradeSeq (v1.10.0), qvalue (v2.28.0), clusterProfiler (v4.4.4), enrichplot (v1.16.1) and SingleCellExperiment (v1.18.0).

For manuscripts utilizing custom algorithms or software that are central to the research but not yet described in published literature, software must be made available to editors and reviewers. We strongly encourage code deposition in a community repository (e.g. GitHub). See the Nature Portfolio [guidelines for submitting code & software](#) for further information.

## Data

Policy information about [availability of data](#)

All manuscripts must include a [data availability statement](#). This statement should provide the following information, where applicable:

- Accession codes, unique identifiers, or web links for publicly available datasets
- A description of any restrictions on data availability
- For clinical datasets or third party data, please ensure that the statement adheres to our [policy](#)

All sequencing data generated in this study have been deposited in the GEO database under accession code GSE218144 [<https://www.ncbi.nlm.nih.gov/geo/query/acc.cgi?acc=GSE218144>] for ChIP-seq, GSE218142 [<https://www.ncbi.nlm.nih.gov/geo/query/acc.cgi?acc=GSE218142>] for ATAC-seq, and GSE218144 [<https://www.ncbi.nlm.nih.gov/geo/query/acc.cgi?acc=GSE218144>] for scRNA-seq. Published ATAC-seq data of cultured helper T cell subsets were from GSE15950531 [<https://www.ncbi.nlm.nih.gov/geo/query/acc.cgi?acc=GSE159505>]. Published ChIP-seq data for GATA3 and Bcl11b were from GSE11187137 [<https://www.ncbi.nlm.nih.gov/geo/query/acc.cgi?acc=GSE111871>] and GSE13108256 [<https://www.ncbi.nlm.nih.gov/geo/query/acc.cgi?acc=GSE131082>], respectively.

## Research involving human participants, their data, or biological material

Policy information about studies with [human participants or human data](#). See also policy information about [sex, gender \(identity/presentation\), and sexual orientation](#) and [race, ethnicity and racism](#).

|                                                                    |     |
|--------------------------------------------------------------------|-----|
| Reporting on sex and gender                                        | N/A |
| Reporting on race, ethnicity, or other socially relevant groupings | N/A |
| Population characteristics                                         | N/A |
| Recruitment                                                        | N/A |
| Ethics oversight                                                   | N/A |

Note that full information on the approval of the study protocol must also be provided in the manuscript.

## Field-specific reporting

Please select the one below that is the best fit for your research. If you are not sure, read the appropriate sections before making your selection.

Life sciences  Behavioural & social sciences  Ecological, evolutionary & environmental sciences

For a reference copy of the document with all sections, see [nature.com/documents/nr-reporting-summary-flat.pdf](https://www.nature.com/documents/nr-reporting-summary-flat.pdf)

## Life sciences study design

All studies must disclose on these points even when the disclosure is negative.

|                 |                                                                                                                                                                                                                                      |
|-----------------|--------------------------------------------------------------------------------------------------------------------------------------------------------------------------------------------------------------------------------------|
| Sample size     | Sample sizes were estimated based on our previous studies. For in vivo experiments, 4-7 mice per group were used. For in vitro culture experiments, 3-5 mice per group were used. Sample sizes were described in the figure legends. |
| Data exclusions | No data were excluded.                                                                                                                                                                                                               |
| Replication     | Reproducibility were ensured at least two independent experiments. Repeated numbers of experiments were described in the figure legends.                                                                                             |
| Randomization   | No randomization was performed. Age- and sex-matched littermates were used as control.                                                                                                                                               |
| Blinding        | No blinding was performed.                                                                                                                                                                                                           |

## Reporting for specific materials, systems and methods

We require information from authors about some types of materials, experimental systems and methods used in many studies. Here, indicate whether each material, system or method listed is relevant to your study. If you are not sure if a list item applies to your research, read the appropriate section before selecting a response.

## Materials &amp; experimental systems

| n/a                                 | Involved in the study                                           |
|-------------------------------------|-----------------------------------------------------------------|
| <input type="checkbox"/>            | <input checked="" type="checkbox"/> Antibodies                  |
| <input type="checkbox"/>            | <input checked="" type="checkbox"/> Eukaryotic cell lines       |
| <input checked="" type="checkbox"/> | <input type="checkbox"/> Palaeontology and archaeology          |
| <input type="checkbox"/>            | <input checked="" type="checkbox"/> Animals and other organisms |
| <input checked="" type="checkbox"/> | <input type="checkbox"/> Clinical data                          |
| <input checked="" type="checkbox"/> | <input type="checkbox"/> Dual use research of concern           |
| <input checked="" type="checkbox"/> | <input type="checkbox"/> Plants                                 |

## Methods

| n/a                                 | Involved in the study                              |
|-------------------------------------|----------------------------------------------------|
| <input type="checkbox"/>            | <input checked="" type="checkbox"/> ChIP-seq       |
| <input type="checkbox"/>            | <input checked="" type="checkbox"/> Flow cytometry |
| <input checked="" type="checkbox"/> | <input type="checkbox"/> MRI-based neuroimaging    |

## Antibodies

## Antibodies used

For flow cytometry analysis:

FITC anti-mouse CD3e Antibody (BioLegend, Cat# 100305, Clone 145-2C11, 1:100 dilution, RRID: AB\_312670)  
 PE anti-mouse CD3e Antibody (BioLegend, Cat# 100308, Clone 145-2C11, 1:100 dilution, RRID: AB\_312673)  
 PerCP/Cyanine5.5 anti-mouse CD3e Antibody (BioLegend, Cat# 100328, Clone 145-2C11, 1:100 dilution, RRID: AB\_893318)  
 Brilliant Violet 510 anti-mouse CD3e Antibody (BioLegend, Cat# 100353, Clone 145-2C11, 1:100 dilution, RRID: AB\_2565879)  
 FITC anti-mouse CD4 Antibody (BioLegend, Cat# 100510, Clone RM4-5, 1:100 dilution, RRID: AB\_312713)  
 PE anti-mouse CD4 Antibody (BioLegend, Cat# 100512, Clone RM4-5, 1:100 dilution, RRID: AB\_312715)  
 PE/Cyanine 7 anti-mouse CD4 Antibody (BioLegend, Cat# 100528, Clone RM4-5, 1:100 dilution, RRID: AB\_312729)  
 Brilliant Violet 510 anti-mouse CD4 Antibody (BioLegend, Cat# 100559, Clone RM4-5, 1:100 dilution, RRID: AB\_2562608)  
 FITC anti-mouse CD5 Antibody (BioLegend, Cat# 100606, Clone 53-7.3, 1:100 dilution, RRID: AB\_312735)  
 PerCP/Cyanine5.5 anti-mouse CD5 Antibody (BioLegend, Cat# 100624, Clone 53-7.3, 1:100 dilution, RRID: AB\_2563433)  
 FITC anti-mouse CD8a Antibody (BD Bioscience, Cat# 553031, Clone 53-6.7, 1:100 dilution, RRID: AB\_394569)  
 PE anti-mouse CD8a Antibody (BD Bioscience, Cat# 553033, Clone 53-6.7, 1:100 dilution, RRID: AB\_394571)  
 PE/Cyanine7 anti-mouse CD8a Antibody (BioLegend, Cat# 100722, Clone 53-6.7, 1:100 dilution, RRID: AB\_312761)  
 FITC anti-mouse/human CD11b Antibody (BioLegend, Cat# 101206, Clone M1/70, 1:50 dilution, RRID: AB\_312789)  
 PE/Cyanine7 anti-mouse/human CD11b Antibody (BioLegend, Cat# 101216, Clone M1/70, 1:50 dilution, RRID: AB\_312799)  
 FITC anti-mouse CD11c Antibody (BioLegend, Cat# 117306, Clone N418, 1:50 dilution, RRID: AB\_313775)  
 PE/Cyanine7 anti-mouse CD11c Antibody (BioLegend, Cat# 117317, Clone N418, 1:50 dilution, RRID: AB\_493569)  
 Purified anti-mouse CD16/32 Antibody (BioLegend, Cat# 101302, Clone 93, 1:100 dilution, RRID: AB\_312801)  
 FITC anti-mouse CD19 Antibody (BioLegend, Cat# 115506, Clone 6D5, 1:50 dilution, RRID: AB\_313641)  
 PE anti-mouse CD25 Antibody (BioLegend, Cat# 102008, Clone PC61, 1:100 dilution, RRID: AB\_312857)  
 Brilliant Violet 421 anti-mouse CD25 Antibody (BioLegend, Cat# 102034, Clone PC61, 1:100 dilution, RRID: AB\_11203373)  
 Brilliant Violet 510 anti-mouse CD25 Antibody (BioLegend, Cat# 102042, Clone PC61, 1:100 dilution, RRID: AB\_2562270)  
 PerCP-Cy5.5 anti-mouse CD44 Antibody (BD Bioscience, Cat# 560570, Clone IM7, 1:100 dilution, RRID: AB\_1727486)  
 FITC anti-mouse/human CD45R/B220 Antibody (BioLegend, Cat# 103206, Clone RA3-6B2, 1:50 dilution, RRID: AB\_312991)  
 Brilliant Violet 421 anti-mouse/human CD45R/B220 Antibody (BioLegend, Cat# 103240, Clone RA3-6B2, 1:50 dilution, RRID: AB\_11203896)  
 PerCP/Cyanine5.5 anti-mouse CD45 Antibody (BioLegend, Cat# 103132, Clone 30-F11, 1:200 dilution, RRID: AB\_893340)  
 BV421 anti-mouse CD45 Antibody (BD Bioscience, Cat# 563890, Clone 30-F11, 1:200 dilution, RRID: AB\_2651151)  
 FITC anti-mouse CD45.1 Antibody (BioLegend, Cat# 110706, Clone A20, 1:200 dilution, RRID: AB\_313495)  
 PerCP/Cyanine5.5 anti-mouse CD45.1 Antibody (BioLegend, Cat# 110727, Clone A20, 1:200 dilution, RRID: AB\_893348)  
 APC anti-mouse CD45.1 Antibody (BioLegend, Cat# 110714, Clone A20, 1:200 dilution, RRID: AB\_313503)  
 Brilliant Violet 605 anti-mouse CD45.1 Antibody (BioLegend, Cat# 110738, Clone A20, 1:200 dilution, RRID: AB\_2562565)  
 APC/Cyanine7 anti-mouse CD45.2 Antibody (BioLegend, Cat# 109824, Clone 104, 1:200 dilution, RRID: AB\_830789)  
 Brilliant Violet 510 anti-mouse CD45.2 Antibody (BioLegend, Cat# 109837, Clone 104, 1:200 dilution, RRID: AB\_2561393)  
 Brilliant Violet 785 anti-mouse CD45.2 Antibody (BioLegend, Cat# 109837, Clone 104, 1:200 dilution, RRID: AB\_2561393)  
 APC anti-mouse CD49a APC Antibody (BioLegend, Cat# 142606, Clone HMA1, 1:100 dilution, RRID: AB\_2562253)  
 FITC anti-mouse CD49b Antibody (BioLegend, Cat# 108906, Clone DX5, 1:50 dilution, RRID: AB\_313413)  
 PE anti-mouse CD49b Antibody (BioLegend, Cat# 108908, Clone DX5, 1:50 dilution, RRID: AB\_313415)  
 PE anti-mouse CD62L Antibody (Thermo Fisher Scientific, Cat# 12-0621-83, Clone MEL-14, 1:100 dilution, RRID: AB\_465722)  
 PerCP/Cyanine5.5 anti-mouse CD90.2 Antibody (BioLegend, Cat# 140322, Clone 53-2.1, 1:100 dilution, RRID: AB\_2562696)  
 PE/Cyanine7 anti-mouse CD90.2 Antibody (BioLegend, Cat# 140310, Clone 53-2.1, 1:100 dilution, RRID: AB\_10643586)  
 Brilliant Violet 510 anti-mouse CD90.2 Antibody (BioLegend, Cat# 140319, Clone 53-2.1, 1:100 dilution, RRID: AB\_2561395)  
 PE/Cyanine7 anti-mouse CD103 Antibody (BioLegend, Cat# 121426, Clone 2E7, 1:100 dilution, RRID: AB\_2563691)  
 PE/Cyanine7 anti-mouse CD127 Antibody (BioLegend, Cat# 135014, Clone A7R34, 1:50 dilution, RRID: AB\_1937265)  
 BV421 anti-mouse CD127 Antibody (BD Bioscience, Cat# 562959, Clone SB/199, 1:50 dilution, RRID: AB\_2737917)  
 PerCP-eFluor 710 anti-mouse CD135 (FLT3) Antibody (Thermo Fisher Scientific, Cat# 46-1351-82, Clone A2F10, 1:50 dilution, RRID: AB\_10733393)  
 Biotin anti-mouse CD135 (FLT3) Antibody (BioLegend, Cat# 135308, Clone A2F10, 1:100 dilution, RRID: AB\_1953267)  
 PE anti-mouse CD196 (CCR6) Antibody (BioLegend, Cat# 129804, Clone 29-2L17, 1:50 dilution, RRID: AB\_1279137)  
 APC anti-mouse CD196 (CCR6) Antibody (BioLegend, Cat# 129814, Clone 29-2L17, 1:50 dilution, RRID: AB\_1877147)  
 PE anti-mouse CD218a (IL-18R $\alpha$ ) Antibody (BioLegend, Cat# 157904, Clone A17071D, 1:100 dilution, RRID: AB\_2860733)  
 PerCP-Cy5.5 anti-human CD271 (NGFR) Antibody (BD Bioscience, Cat# 560834, Clone C40-1457, 1:200 dilution, RRID: AB\_10561839)

V450 anti-human CD271 (NGFR) Antibody (BD Bioscience, Cat# 562123, Clone A51:D980-1457, 1:200 dilution, RRID: AB\_10926195)  
 Pacific Blue anti-human/mouse/rat CD278 (ICOS) Antibody (BioLegend, Cat# 313522, Clone C398.4A, 1:100 dilution, RRID: AB\_10899736)  
 PE/Cyanine7 anti-mouse CD279 (PD-1) Antibody (BioLegend, Cat# 135216, Clone 29F.1A12, 1:100 dilution, RRID: AB\_10689635)  
 PerCP/Cyanine5.5 anti-mouse CD279 (PD-1) Antibody (BioLegend, Cat# 135208, Clone 29F.1A12, 1:100 dilution, RRID: AB\_2159184)  
 APC/Cyanine7 anti-mouse CD279 (PD-1) Antibody (BioLegend, Cat# 329922, Clone EH12.2H7, 1:100 dilution, RRID: AB\_10933429)  
 FITC anti-mouse CD335 (NKp46) Antibody (BioLegend, Cat# 137605, Clone 29A1.4, 1:100 dilution, RRID: AB\_2149150)  
 eFluor 660 anti-mouse/human GATA-3 Antibody (Thermo Fisher Scientific, Cat# 50-9966-42, Clone TWAJ, 1:50 dilution, RRID: AB\_10596663)  
 PE/Cyanine7 anti-mouse/human GATA-3 Antibody (Thermo Fisher Scientific, Cat# 25-9966-42, Clone TWAJ, 1:50 dilution, RRID: AB\_2573568)  
 Alexa Fluor 647 anti-mouse GATA3 Antibody (BD Bioscience, Cat# 560078, Clone L50-823, 1:50 dilution, RRID: AB\_1645317)  
 PerCP/Cyanine5.5 anti-mouse I-A/I-E Antibody (BioLegend, Cat# 107626, Clone M5/114.15.2, 1:200 dilution, RRID: AB\_2191071)  
 PE anti-mouse Ly6A/E (Sca1) Antibody (BD Bioscience, Cat# 553333, Clone E13-161-7, 1:200 dilution, RRID: AB\_394789)  
 APC anti-mouse Ly6A/E (Sca1) Antibody (BioLegend, Cat# 122512, Clone E13-161-7, 1:200 dilution, RRID: AB\_756197)  
 FITC anti-mouse Ly-6G/Ly-6C Antibody (BioLegend, Cat# 108405, Clone RB6-8C5, 1:50 dilution, RRID: AB\_313370)  
 FITC anti-mouse Ly-6G Antibody (BioLegend, Cat# 127606, Clone 1A8, 1:100 dilution, RRID: AB\_1236494)  
 APC anti-mouse Ly-6G Antibody (BioLegend, Cat# 127614, Clone 1A8, 1:100 dilution, RRID: AB\_2227348)  
 PE anti-mouse Integrin  $\alpha\beta 7$  (LPAM) Antibody (BioLegend, Cat# 120606, Clone DATK32, 1:100 dilution, RRID: AB\_493267)  
 APC anti-mouse Integrin  $\alpha\beta 7$  (LPAM) Antibody (BioLegend, Cat# 120608, Clone DATK32, 1:100 dilution, RRID: AB\_10730607)  
 PerCP-eFluor 710 anti-mouse Integrin  $\alpha\beta 7$  (LPAM) Antibody (Thermo Fisher Scientific, Cat# 46-5887-82, Clone DATK32, 1:100 dilution, RRID: AB\_2573793)  
 PE anti-mouse/human KLRG1 (MAFA) Antibody (BioLegend, Cat# 138408, Clone 2F1/KLRG1, 1:100 dilution, RRID: AB\_10574313)  
 PE/Cyanine7 anti-mouse/human KLRG1 (MAFA) Antibody (BioLegend, Cat# 138416, Clone 2F1/KLRG1, 1:100 dilution, RRID: AB\_2561736)  
 PE anti-mouse/human IL-5 Antibody (BioLegend, Cat# 504304, Clone TRFK5, 1:100 dilution, RRID: AB\_2574279)  
 eFluor660 anti-mouse IL-13 Antibody (Thermo Fisher Scientific, Cat# 50-7133-82, Clone eBio13A, 1:100 dilution, RRID: AB\_2574279)  
 Alexa Fluor 647 anti-mouse IL-17RB Antibody (BioLegend, Cat# 146304, Clone 9B10, 1:100 dilution, RRID: AB\_2562381)  
 PE anti-mouse IL-17RB Antibody (BioLegend, Cat# 146306, Clone 9B10, 1:100 dilution, RRID: AB\_2564512)  
 PE/Cyanine7 anti-mouse IL-33R $\alpha$  (IL1RL1, ST2) Antibody (BioLegend, Cat# 145316, Clone DIH9, 1:50 dilution, RRID: AB\_2687367)  
 APC anti-mouse IL-33R $\alpha$  (IL1RL1, ST2) Antibody (BioLegend, Cat# 145306, Clone DIH9, 1:50 dilution, RRID: AB\_2561917)  
 Brilliant Violet 421 anti-mouse IL-33R $\alpha$  (IL1RL1, ST2) Antibody (BioLegend, Cat# 145309, Clone DIH9, 1:100 dilution, RRID: AB\_2565634)  
 PE anti-mouse PLZF Antibody (BioLegend, Cat# 145804, Clone 9E12, 1:100 dilution, RRID: AB\_2561973)  
 FITC anti-mouse NK1.1 Antibody (BioLegend, Cat# 108706, Clone PK136, 1:100 dilution, RRID: AB\_3133393)  
 PE anti-mouse ROR $\gamma$ t Antibody (BD Bioscience, Cat# 562607, Clone Q31-378, 1:100 dilution, RRID: AB\_11153137)  
 BV421 anti-mouse ROR $\gamma$ t Antibody (BD Bioscience, Cat# 562894, Clone Q31-378, 1:100 dilution, RRID: AB\_2687545)  
 BV510 anti-mouse ROR $\gamma$ t Antibody (BD Bioscience, Cat# 567177, Clone Q31-378, 1:100 dilution, RRID: AB\_2916491)  
 PE anti-mouse Siglec-F Antibody (BD Bioscience, Cat# 552126, Clone E50-2440, 1:100 dilution, RRID: AB\_394341)  
 PE anti-mouse/human T-bet Antibody (BioLegend, Cat# 644810, Clone 4B10, 1:100 dilution, RRID: AB\_2200542)  
 PE/Cyanine7 anti-mouse/human T-bet Antibody (BioLegend, Cat# 644824, Clone 4B10, 1:100 dilution, RRID: AB\_2561761)  
 FITC anti-mouse TCR  $\beta$  chain Antibody (BioLegend, Cat# 109206, Clone H57-597, 1:100 dilution, RRID: AB\_313429)  
 PE anti-mouse TCR  $\gamma/\delta$  Antibody (BioLegend, Cat# 107508, Clone UC7-13D5, 1:100 dilution, RRID: AB\_345266)  
 FITC anti-mouse Ter119 Antibody (BioLegend, Cat# 116206, Clone TER-119, 1:50 dilution, RRID: AB\_313707)

#### For in vivo experiments:

Anti-mouse CD3e Antibody (BioXCell, Cat# BE0001-1, Clone 145-2C11, RRID: AB\_1107634)  
 Anti-CD28 Antibody (BioXCell, Cat# BE0015-1, Clone 37.51, RRID: AB\_1107624)  
 Anti-IFN $\gamma$  Antibody (BioXCell, Cat# BP0055, Clone XMG1.2, RRID: AB\_1107694)  
 Anti-IL-4 Antibody (BioXCell, Cat# BP0045, Clone 11B11, RRID: AB\_1107707)

#### For ChIP-seq analysis:

Anti-H3K27ac Antibody (Abcam, Cat# ab4729, Clone ab4729, RRID: AB\_2118291)

#### For single-cell RNA-sequencing analysis:

Hashtag 2 anti-mouse TotalSeq-A0302 (BioLegend, Cat# 155803, RRID: AB\_2750033)  
 Hashtag 3 anti-mouse TotalSeq-A0303 (BioLegend, Cat# 155805, RRID: AB\_2750034)  
 Hashtag 7 anti-mouse TotalSeq-A0307 (BioLegend, Cat# 155813, RRID: AB\_2750039)  
 Hashtag 8 anti-mouse TotalSeq-A0308 (BioLegend, Cat# 155815, RRID: AB\_2750040)  
 Hashtag 9 anti-mouse TotalSeq-A0309 (BioLegend, Cat# 155817, RRID: AB\_2750042)  
 Hashtag 10 anti-mouse TotalSeq-A0310 (BioLegend, Cat# 155819, RRID: AB\_2750043)  
 Hashtag 11 anti-mouse TotalSeq-A0311 (BioLegend, Cat# 155821, RRID: AB\_2750136)  
 Hashtag 12 anti-mouse TotalSeq-A0312 (BioLegend, Cat# 155823, RRID: AB\_2750137)

Validation

For the validation information, we refer to the information provided by the supplying companies.

## Eukaryotic cell lines

Policy information about [cell lines and Sex and Gender in Research](#)

|                                                                      |                                                                                                                                                                                  |
|----------------------------------------------------------------------|----------------------------------------------------------------------------------------------------------------------------------------------------------------------------------|
| Cell line source(s)                                                  | Plat-E cells were provided by Dr. Daisuke Kitamura (Tokyo University of Science).<br>OP9-DL1 cells were provided by Dr. Hiroyuki Hosokawa (Tokai University School of Medicine). |
| Authentication                                                       | The cell lines were not authenticated.                                                                                                                                           |
| Mycoplasma contamination                                             | Mycoplasma test were negative.                                                                                                                                                   |
| Commonly misidentified lines<br>(See <a href="#">ICLAC</a> register) | No commonly misidentified lines were used in this study.                                                                                                                         |

## Animals and other research organisms

Policy information about [studies involving animals](#); [ARRIVE guidelines](#) recommended for reporting animal research, and [Sex and Gender in Research](#)

|                         |                                                                                                                                                                                                                                                                                                                                                                                               |
|-------------------------|-----------------------------------------------------------------------------------------------------------------------------------------------------------------------------------------------------------------------------------------------------------------------------------------------------------------------------------------------------------------------------------------------|
| Laboratory animals      | C57BL/6J were purchased from CLEA Japan Inc. (Tokyo, Japan), and CD45.1 mice were purchased from RIKEN BRC (Ibaraki, Japan). The G3SEKO mice were generated using CRIPSR-Cas9 system in Biomedical Research Center, Chiba University. Mice were housed in micro-isolator cages under specific pathogen-free conditions. Six- to twelve-week-old male and female mice were used in this study. |
| Wild animals            | No wild animals were used in this study.                                                                                                                                                                                                                                                                                                                                                      |
| Reporting on sex        | We used both sex mice for in vivo steady state experiments and in vitro experiments. We used female mice for the asthma model as it is known that phenotype is attenuated in male mice.                                                                                                                                                                                                       |
| Field-collected samples | No field-collected samples were used in this study                                                                                                                                                                                                                                                                                                                                            |
| Ethics oversight        | Chiba University Animal Care and Use Committee approved the animal procedures used in this study.                                                                                                                                                                                                                                                                                             |

Note that full information on the approval of the study protocol must also be provided in the manuscript.

## Plants

|                       |     |
|-----------------------|-----|
| Seed stocks           | N/A |
| Novel plant genotypes | N/A |
| Authentication        | N/A |

## ChIP-seq

### Data deposition

- Confirm that both raw and final processed data have been deposited in a public database such as [GEO](#).
- Confirm that you have deposited or provided access to graph files (e.g. BED files) for the called peaks.

|                                                                    |                                                                                                                                                                                                                                                                                                                                                                   |
|--------------------------------------------------------------------|-------------------------------------------------------------------------------------------------------------------------------------------------------------------------------------------------------------------------------------------------------------------------------------------------------------------------------------------------------------------|
| Data access links<br><i>May remain private before publication.</i> | To review GEO accession GSE218144:<br>Go to <a href="https://www.ncbi.nlm.nih.gov/geo/query/acc.cgi?acc=GSE218144">https://www.ncbi.nlm.nih.gov/geo/query/acc.cgi?acc=GSE218144</a>                                                                                                                                                                               |
| Files in database submission                                       | GSM6735425_DK18117_15.fastq.gz<br>GSM6735426_DK18098_12.fastq.gz<br>GSM6735427_DK18117_7.fastq.gz<br>GSM6735428_DK18098_14.fastq.gz<br>GSM6735425_ChIP-seq_H3K27ac_CD4T_control.bedgraph.gz<br>GSM6735426_ChIP-seq_H3K27ac_CD4T_asthma.bedgraph.gz<br>GSM6735427_ChIP-seq_H3K27ac_ILC2_control.bedgraph.gz<br>GSM6735428_ChIP-seq_H3K27ac_ILC2_asthma.bedgraph.gz |
| Genome browser session<br>(e.g. <a href="#">UCSC</a> )             | <i>Provide a link to an anonymized genome browser session for "Initial submission" and "Revised version" documents only, to enable peer review. Write "no longer applicable" for "Final submission" documents.</i>                                                                                                                                                |

## Methodology

|            |                                           |
|------------|-------------------------------------------|
| Replicates | No replicates for ChIP-seq in this study. |
|------------|-------------------------------------------|

|                         |                                                                                                                                                                                                                        |
|-------------------------|------------------------------------------------------------------------------------------------------------------------------------------------------------------------------------------------------------------------|
| Sequencing depth        | Sequencing were perform using HiSeq2500 with single-end 50bp. More than forty million reads were obtained from each sample. Ninety percent of reads were uniquely mapped on mouse mm10 genome.                         |
| Antibodies              | abcam Rabbit polyclonal antibody to anti-Histone H3 (acetyl K27) - ChIP Grade (cat # ab4729).                                                                                                                          |
| Peak calling parameters | SEs from H3K27ac ChIP-seq data were identified using findPeaks in the HOMER package with the following parameter, -style superhistone, -poisson 1e-8, and -excludePeaks option for excluding TSS $\pm$ 2500 kb region. |
| Data quality            | All ChIP-seq dataset exhibited more than 30000 peaks above the threshold FDR 5%. Appropriate IP efficiency is more than 20%. Analysis in this paper employed "-poisson 1e-8" as the threshold.                         |
| Software                | ChIP-seq data was analyzed using Bowtie2 (v2.4.2), edgeR (3.38.1), Homer (v4.11) and UCSC genome browser.                                                                                                              |

## Flow Cytometry

### Plots

Confirm that:

- The axis labels state the marker and fluorochrome used (e.g. CD4-FITC).
- The axis scales are clearly visible. Include numbers along axes only for bottom left plot of group (a 'group' is an analysis of identical markers).
- All plots are contour plots with outliers or pseudocolor plots.
- A numerical value for number of cells or percentage (with statistics) is provided.

### Methodology

|                           |                                                                                                                                                                                                                                                                                                                                                                                                                                                                                                                                                                                                                                                                                                                                                                                                                                                                                                                                                                                                                                                                                                                                                                                                                                                                                                                                                                                                                                                                                                                                                                                                                                                                                                                                                                                                                                                                    |
|---------------------------|--------------------------------------------------------------------------------------------------------------------------------------------------------------------------------------------------------------------------------------------------------------------------------------------------------------------------------------------------------------------------------------------------------------------------------------------------------------------------------------------------------------------------------------------------------------------------------------------------------------------------------------------------------------------------------------------------------------------------------------------------------------------------------------------------------------------------------------------------------------------------------------------------------------------------------------------------------------------------------------------------------------------------------------------------------------------------------------------------------------------------------------------------------------------------------------------------------------------------------------------------------------------------------------------------------------------------------------------------------------------------------------------------------------------------------------------------------------------------------------------------------------------------------------------------------------------------------------------------------------------------------------------------------------------------------------------------------------------------------------------------------------------------------------------------------------------------------------------------------------------|
| Sample preparation        | <p>Single-cell suspensions of the lungs were generated as below. Lungs were cut into small pieces and digested in RPMI containing Collagenase A (1 mg/ml) and DNase I (0.1 mg/ml) using gentleMACS Dissociator (Miltenyi Biotec) for 30 min at 37°C and then passed through 70 <math>\mu</math>m filter.</p> <p>Single-cell suspensions of the bone marrow cells were harvested from the cut-off of both ends of the femur, tibia and pelvis, humerus, and scapula of mice using a centrifuge.</p> <p>Splenocytes and thymocytes were isolated by physical dissociation.</p> <p>Single-cell suspensions of the liver cells were prepared as below. The liver was minced into small pieces after perfusion with 10 ml PBS and digested in RPMI containing Liberase TM (0.05 mg/ml) and DNase I (0.2 mg/ml) for 45 min at 37°C using gentleMACS Dissociator. After passing through a 100 <math>\mu</math>m filter, hepatic leukocytes were isolated from the interface between 40% and 80% Percoll gradient.</p> <p>Single-cell suspensions of the small intestine cells were generated as below. The small intestine was opened longitudinally and washed four times with PBS. After cutting the small intestine into pieces, mucus and epithelial cells were removed by first incubating 15 min at 37°C in HBSS containing 10% FBS, 15m M HEPES, 5 mM EDTA, and 1 mM DTT. After washing thoroughly with PBS three times, the samples were minced into small pieces and digested in RPM containing 10% FBS, Liberase TL (0.25 mg/ml), and DNase I (0.3 mg/ml) for 30 min at 37°C using gentleMACS Dissociator. After passing through a 100 <math>\mu</math>m filter, intestine leukocytes were purified using the Percoll gradient as described above.</p> <p>All single cells were passed through a 30 <math>\mu</math>m filter before downstream experiments.</p> |
| Instrument                | BD FACSCantII, BD LSRFortessa X-20 were used for flow cytometry data collection. SONY SH800, BD FACSMelody and BD FACSAriaII were used for cell sorting.                                                                                                                                                                                                                                                                                                                                                                                                                                                                                                                                                                                                                                                                                                                                                                                                                                                                                                                                                                                                                                                                                                                                                                                                                                                                                                                                                                                                                                                                                                                                                                                                                                                                                                           |
| Software                  | FlowJo Version 10.7.1 and 10.8.1.                                                                                                                                                                                                                                                                                                                                                                                                                                                                                                                                                                                                                                                                                                                                                                                                                                                                                                                                                                                                                                                                                                                                                                                                                                                                                                                                                                                                                                                                                                                                                                                                                                                                                                                                                                                                                                  |
| Cell population abundance | Post sort purity was more than 90%.                                                                                                                                                                                                                                                                                                                                                                                                                                                                                                                                                                                                                                                                                                                                                                                                                                                                                                                                                                                                                                                                                                                                                                                                                                                                                                                                                                                                                                                                                                                                                                                                                                                                                                                                                                                                                                |
| Gating strategy           | The lymphocytes were gated based on FSC-A and SSC-A. Singlets were gated based on FSC-A and FSC-W. Live cells were identified as Zombie-dye negative cells. Cell specific gating strategy were described in Supplementary Fig. 4.                                                                                                                                                                                                                                                                                                                                                                                                                                                                                                                                                                                                                                                                                                                                                                                                                                                                                                                                                                                                                                                                                                                                                                                                                                                                                                                                                                                                                                                                                                                                                                                                                                  |

- Tick this box to confirm that a figure exemplifying the gating strategy is provided in the Supplementary Information.
